# Supplementary material for: Practice-Level Variation in Molecular Testing and Use of Targeted Therapy for Patients With Non–Small Cell Lung Cancer and Colorectal Cancer
Source: PubMed Central journal article supplement (PMC10148196; doi:10.1001/jamanetworkopen.2023.10809), 2023-04-28

## Supplemental Online Content

Roberts TJ, Kehl KL, Brooks GA, et al. Practice-level variation in molecular testing and use of targeted therapy for patients with non–small cell lung cancer and colorectal cancer. *JAMA Netw Open*. 2023;6(4):e2310809.  
doi:10.1001/jamanetworkopen.2023.10809

**eTable 1.** Systemic Therapies for Non–Small Cell Lung Cancer

**eTable 2.** Systemic Therapies for Colorectal Cancer

**eTable 3.** Billing Codes for Lung Cancer Resection Surgeries

**eTable 4.** Billing Codes for Radiation Therapy

**eTable 5.** Billing Codes for Colorectal Cancer Resection Surgeries

**eTable 6.** Billing Codes for Molecular Tests

**eTable 7.** *ICD-10* Codes for Colorectal Cancer Categorized by Site

**eTable 8.** Full Regression Results

**eTable 9.** NSCLC Molecular Testing Sensitivity Analysis (Excluding IHC)

**eTable 10.** NSCLC Molecular Testing Sensitivity Analysis (Bevacizumab/Pemetrexed)

**eTable 11.** CRC Molecular Testing Sensitivity Analysis (Excluding IHC)

**eTable 12.** NSCLC Targeted Therapy Sensitivity Analysis (2017-2019)

**eTable 13.** Variation Across Oncology Practices

**eFigure.** Trends in Use of Erlotinib and Other Targeted Therapies

This supplemental material has been provided by the authors to give readers additional information about their work.

**eTable 1. Systemic Therapies for Non–Small Cell Lung Cancer**

| Therapeutic class  | Drug name     | Part B or D | HCPCS Codes                                     | NDC Codes                      |
|--------------------|---------------|-------------|-------------------------------------------------|--------------------------------|
| Targeted Therapies | Osimertinib   | Part D      | NA                                              | 00310-1349-30<br>00310-1350-30 |
|                    | Erlotinib     | Part D      | NA                                              | 72485-0217-30                  |
|                    |               |             |                                                 | 72485-0219-30                  |
|                    |               |             |                                                 | 72485-0218-30                  |
|                    |               |             |                                                 | 00378-7132-93                  |
|                    |               |             |                                                 | 00378-7133-93                  |
|                    |               |             |                                                 | 00378-7131-93                  |
|                    |               |             |                                                 | 63304-0135-30                  |
|                    |               |             |                                                 | 63304-0096-30                  |
|                    |               |             |                                                 | 63304-0095-30                  |
|                    |               |             |                                                 | 00093-7664-56                  |
|                    | 00093-7663-56 |             |                                                 |                                |
| 54569-5848-00      |               |             |                                                 |                                |
| 54569-5847-00      |               |             |                                                 |                                |
| 50242-0062-01      |               |             |                                                 |                                |
| 50242-0064-01      |               |             |                                                 |                                |
| 50242-0063-01      |               |             |                                                 |                                |
| 54868-5290-00      |               |             |                                                 |                                |
| 54868-5447-00      |               |             |                                                 |                                |
| 54868-5474-00      |               |             |                                                 |                                |
| Afatinib           | Part D        | NA          | 00597-0141-30<br>00597-0137-30<br>00597-0138-30 |                                |
| Gefitinib          | Part D        | J8565       | 00310-0482-30                                   |                                |
| Alectinib          | Part D        | NA          | 50242-0130-01                                   |                                |
| Brigatinib         | Part D        | NA          | 76189-0113-21                                   |                                |
|                    |               |             | 76189-0113-18                                   |                                |
|                    |               |             | 63020-0180-30                                   |                                |
|                    |               |             | 63020-0090-30                                   |                                |
|                    |               |             | 63020-0113-30                                   |                                |
|                    |               |             | 63020-0090-07                                   |                                |
| 63020-0198-30      |               |             |                                                 |                                |
| Ceritinib          | Part D        | NA          | 00078-0694-84<br>00078-0640-70                  |                                |

|                        |               |        |              |                                                                                   |
|------------------------|---------------|--------|--------------|-----------------------------------------------------------------------------------|
|                        | Crizotinib    | Part D | NA           | 00069-8140-20<br>00069-8141-20                                                    |
|                        | Lorlatinib    | Part D | NA           | 00069-0231-01<br>00069-0227-01                                                    |
|                        | Dabrafenib    | Part D | NA           | 00173-0847-08<br>00078-0682-66<br>00173-0846-08<br>00078-0681-66                  |
|                        | Trametinib    | Part D | NA           | 00078-0668-15<br>00173-0849-13<br>00078-0666-15<br>00173-0848-13                  |
|                        | Vemurafenib   | Part D | NA           | 50242-0090-02<br>50242-0090-01                                                    |
|                        | Dacomitinib   | Part D | NA           | 00069-0197-30<br>00069-2299-30<br>00069-1198-30                                   |
|                        | Entrectinib   | Part D | NA           | 50242-0091-30<br>50242-0094-90                                                    |
|                        | Larotrectinib | Part D | NA           | 50419-0391-01<br>50419-0392-01<br>71777-0391-01<br>71777-0392-01<br>71777-0390-01 |
| <b>Immunotherapies</b> | Pembrolizumab | Part B | C9027; J9271 | 00006-3026-02<br>00006-3026-01<br>00006-3029-01<br>00006-3029-02<br>00006-3026-04 |
|                        | Durvalumab    | Part B | J9173; C9492 | 00310-4611-50<br>00310-4500-12                                                    |
|                        | Atezolizumab  | Part B | J9022; C9483 | 50242-0918-01<br>50242-0917-01                                                    |
|                        | Ipilimumab    | Part B | J9228; C9284 | 00003-2328-22<br>00003-2327-11                                                    |
|                        | Nivolumab     | Part B | C9453; J9299 | 00003-3774-12<br>00003-3734-13<br>00003-3772-11                                   |

|                                                          |             |        |       |                                                                                                                                                                                                                                                                                                                                                                                                                                                                                                                                                                                                                                                                    |
|----------------------------------------------------------|-------------|--------|-------|--------------------------------------------------------------------------------------------------------------------------------------------------------------------------------------------------------------------------------------------------------------------------------------------------------------------------------------------------------------------------------------------------------------------------------------------------------------------------------------------------------------------------------------------------------------------------------------------------------------------------------------------------------------------|
| <b>Chemotherapy<br/>and other systemic<br/>therapies</b> | Carboplatin | Part B | J9045 | 55390-0221-01<br>55390-0222-01<br>55390-0220-01<br>61703-0339-62<br>61703-0339-61<br>61703-0339-63<br>16729-0295-31<br>16729-0295-12<br>16729-0295-33<br>16729-0295-34<br>47781-0606-94<br>47781-0604-27<br>47781-0603-20<br>47781-0605-94<br>63323-0167-20<br>63323-0166-10<br>63323-0168-00<br>10019-0912-03<br>10019-0912-02<br>10019-0916-01<br>10019-0917-01<br>10019-0912-01<br>10019-0915-01<br>55390-0151-01<br>55390-0152-01<br>55390-0150-01<br>55390-0153-01<br>55390-0155-01<br>55390-0154-01<br>55390-0156-01<br>63323-0172-45<br>63323-0172-60<br>63323-0167-21<br>63323-0172-15<br>63323-0172-05<br>10139-0060-15<br>10139-0060-45<br>10139-0060-05 |
|----------------------------------------------------------|-------------|--------|-------|--------------------------------------------------------------------------------------------------------------------------------------------------------------------------------------------------------------------------------------------------------------------------------------------------------------------------------------------------------------------------------------------------------------------------------------------------------------------------------------------------------------------------------------------------------------------------------------------------------------------------------------------------------------------|

|  |  |  |               |
|--|--|--|---------------|
|  |  |  | 00409-1129-12 |
|  |  |  | 00409-1129-11 |
|  |  |  | 00409-1129-10 |
|  |  |  | 61703-0339-56 |
|  |  |  | 61703-0339-22 |
|  |  |  | 61703-0339-50 |
|  |  |  | 61703-0339-18 |
|  |  |  | 50742-0445-05 |
|  |  |  | 50742-0447-45 |
|  |  |  | 50742-0448-60 |
|  |  |  | 50742-0446-15 |
|  |  |  | 71288-0100-15 |
|  |  |  | 71288-0100-05 |
|  |  |  | 71288-0100-45 |
|  |  |  | 71288-0100-51 |
|  |  |  | 67457-0493-46 |
|  |  |  | 67457-0494-61 |
|  |  |  | 67457-0492-15 |
|  |  |  | 67457-0491-54 |
|  |  |  | 67817-0067-12 |
|  |  |  | 67817-0063-12 |
|  |  |  | 67817-0066-12 |
|  |  |  | 67817-0061-12 |
|  |  |  | 15210-0067-12 |
|  |  |  | 15210-0066-12 |
|  |  |  | 15210-0063-12 |
|  |  |  | 15210-0061-12 |
|  |  |  | 50111-0966-76 |
|  |  |  | 50111-0965-76 |
|  |  |  | 25021-0202-51 |
|  |  |  | 25021-0202-15 |
|  |  |  | 25021-0202-05 |
|  |  |  | 25021-0202-45 |
|  |  |  | 66758-0047-01 |
|  |  |  | 66758-0047-04 |
|  |  |  | 66758-0047-02 |
|  |  |  | 66758-0047-03 |
|  |  |  | 47335-0300-40 |

|  |  |  |               |
|--|--|--|---------------|
|  |  |  | 47335-0284-40 |
|  |  |  | 47335-0151-40 |
|  |  |  | 47335-0150-40 |
|  |  |  | 00703-4246-01 |
|  |  |  | 00703-3264-01 |
|  |  |  | 00703-3246-11 |
|  |  |  | 00703-3266-01 |
|  |  |  | 00703-3244-11 |
|  |  |  | 00703-3249-11 |
|  |  |  | 00703-3248-11 |
|  |  |  | 00703-3268-71 |
|  |  |  | 00703-4244-01 |
|  |  |  | 00703-4248-01 |
|  |  |  | 00703-3268-01 |
|  |  |  | 00703-3278-01 |
|  |  |  | 00703-3276-01 |
|  |  |  | 00703-3274-01 |
|  |  |  | 00703-4239-01 |
|  |  |  | 50111-0967-76 |
|  |  |  | 00591-3687-11 |
|  |  |  | 00591-2219-11 |
|  |  |  | 00591-2220-11 |
|  |  |  | 00591-3337-12 |
|  |  |  | 00591-3454-60 |
|  |  |  | 00591-3336-26 |
|  |  |  | 00591-3338-89 |
|  |  |  | 67457-0608-20 |
|  |  |  | 61703-0360-22 |
|  |  |  | 61703-0360-18 |
|  |  |  | 61703-0360-50 |
|  |  |  | 00703-4248-91 |
|  |  |  | 00015-3230-11 |
|  |  |  | 00015-3232-11 |
|  |  |  | 00015-3233-11 |
|  |  |  | 00015-3231-11 |
|  |  |  | 00015-3210-30 |
|  |  |  | 00015-3216-30 |
|  |  |  | 00015-3211-76 |

|  |           |        |                                                                                                                                                                                                                                                                                                                                                                                                                                                |
|--|-----------|--------|------------------------------------------------------------------------------------------------------------------------------------------------------------------------------------------------------------------------------------------------------------------------------------------------------------------------------------------------------------------------------------------------------------------------------------------------|
|  |           |        | 00015-3214-30<br>00015-3213-30<br>00015-3212-30<br>00015-3211-30<br>00015-3215-30<br>00015-3212-76<br>00015-3210-76<br>00015-3214-29<br>00015-3213-29<br>00015-3215-29<br>00703-4239-81<br>00703-4248-81<br>00703-4246-81<br>00703-4244-81                                                                                                                                                                                                     |
|  | Cisplatin | Part B | C9418; J9060;<br>J9062<br>16729-0288-11<br>16729-0288-38<br>47781-0610-23<br>47781-0609-25<br>70860-0206-50<br>70860-0206-51<br>10019-0910-01<br>10019-0910-02<br>55390-0099-01<br>55390-0112-99<br>55390-0112-50<br>68001-0283-24<br>68001-0283-33<br>68001-0283-32<br>68001-0283-27<br>51552-1076-09<br>63323-0103-51<br>63323-0103-64<br>63323-0103-65<br>00143-9505-01<br>00143-9504-01<br>62991-2849-01<br>62991-2849-02<br>67457-0425-51 |

|  |             |        |                                                                                                                                                                                                                                                                                                                                                                                                     |
|--|-------------|--------|-----------------------------------------------------------------------------------------------------------------------------------------------------------------------------------------------------------------------------------------------------------------------------------------------------------------------------------------------------------------------------------------------------|
|  |             |        | 00069-0084-07<br>67457-0424-10<br>00069-0081-01<br>49452-2078-02<br>49452-2078-01<br>49452-2078-03<br>00703-5747-11<br>00703-5748-11<br>44567-0511-01<br>44567-0510-01<br>44567-0530-01<br>44567-0509-01<br>63323-0103-91<br>63323-0103-95<br>55390-0414-99<br>55390-0187-01<br>55390-0414-50<br>00015-3070-20<br>00015-3072-20<br>00015-3221-22<br>00015-3220-22<br>00015-3220-26<br>00015-3221-26 |
|  | Ramucirumab | Part B | C9025; J9308<br>00002-7678-01<br>00002-7669-01                                                                                                                                                                                                                                                                                                                                                      |
|  | Vinorelbine | Part B | C9440; J9390<br>55390-0267-01<br>55390-0268-01<br>64370-0250-01<br>64370-0210-01<br>00173-0656-44<br>00173-0656-01<br>60831-3086-02<br>64370-0532-02<br>64370-0532-01<br>64370-3086-02<br>64370-3086-01<br>60831-3086-01<br>67457-0479-53                                                                                                                                                           |



|  |           |        |                                                                                                                                                                                                                                                                                                                                                                                                                                                                                          |
|--|-----------|--------|------------------------------------------------------------------------------------------------------------------------------------------------------------------------------------------------------------------------------------------------------------------------------------------------------------------------------------------------------------------------------------------------------------------------------------------------------------------------------------------|
|  |           |        | 00069-0099-01<br>00069-0103-03<br>67457-0431-11<br>25021-0204-01<br>25021-0204-05<br>66758-0045-01<br>66758-0045-02<br>45963-0607-55<br>45963-0607-56<br>00069-0205-50<br>00069-0205-10<br>67457-0481-01<br>10019-0970-02<br>10019-0970-01<br>59911-5958-01<br>59911-5959-01<br>63323-0148-05<br>63323-0148-01<br>61703-0341-06<br>61703-0341-09<br>00703-4183-01<br>00703-4183-91<br>00703-4183-81<br>00703-4182-81<br>00703-4182-91<br>00703-4182-01<br>55390-0069-01<br>55390-0070-01 |
|  | Etoposide | Part B | J8560; J9181;<br>J9182;<br>WW030;<br>WW031;<br>WW032;<br>C9425; C9414<br>54569-5718-00<br>00703-5667-01<br>00074-1485-02<br>00074-1485-01<br>00074-1485-03<br>00703-5646-01<br>00703-5643-01<br>16729-0114-11<br>16729-0114-31<br>16729-0114-08                                                                                                                                                                                                                                          |

|  |  |  |               |
|--|--|--|---------------|
|  |  |  | 00186-1571-31 |
|  |  |  | 10019-0930-02 |
|  |  |  | 10019-0930-01 |
|  |  |  | 68001-0265-24 |
|  |  |  | 68001-0265-22 |
|  |  |  | 68001-0265-27 |
|  |  |  | 68001-0265-23 |
|  |  |  | 68001-0265-26 |
|  |  |  | 68001-0265-25 |
|  |  |  | 63323-0104-25 |
|  |  |  | 63323-0104-05 |
|  |  |  | 63323-0104-50 |
|  |  |  | 00703-5668-01 |
|  |  |  | 00143-9510-01 |
|  |  |  | 00143-9512-01 |
|  |  |  | 00143-9511-01 |
|  |  |  | 00209-3080-20 |
|  |  |  | 00209-3090-20 |
|  |  |  | 00209-3060-22 |
|  |  |  | 00209-3070-20 |
|  |  |  | 38779-0784-03 |
|  |  |  | 38779-0784-06 |
|  |  |  | 00378-3266-94 |
|  |  |  | 54868-5355-01 |
|  |  |  | 54868-5355-00 |
|  |  |  | 54868-5355-02 |
|  |  |  | 51927-2772-00 |
|  |  |  | 00364-3028-53 |
|  |  |  | 58406-0714-18 |
|  |  |  | 58406-0711-12 |
|  |  |  | 51079-0965-05 |
|  |  |  | 55390-0291-01 |
|  |  |  | 55390-0293-01 |
|  |  |  | 55390-0292-01 |
|  |  |  | 16729-0262-31 |
|  |  |  | 55390-0492-01 |
|  |  |  | 55390-0491-01 |
|  |  |  | 55390-0493-01 |

|             |        |       |                                                                                                                                                                                                                                                                                                                                                  |
|-------------|--------|-------|--------------------------------------------------------------------------------------------------------------------------------------------------------------------------------------------------------------------------------------------------------------------------------------------------------------------------------------------------|
|             |        |       | 00013-7356-88<br>00013-7346-94<br>00013-7336-91<br>00703-5653-01<br>00703-5656-01<br>00703-5657-01<br>00703-5657-91<br>00703-5656-91<br>00015-3084-20<br>00015-3061-20<br>00015-3062-20<br>00015-3091-45<br>00015-3095-20<br>00015-3062-24<br>00015-3095-30<br>00015-3061-24<br>00015-3404-20                                                    |
| Gemcitabine | Part B | J9201 | 16729-0391-30<br>16729-0426-05<br>68001-0342-34<br>68001-0348-36<br>16729-0117-11<br>16729-0092-03<br>16729-0118-38<br>16729-0423-33<br>16729-0419-03<br>60505-6113-06<br>60505-6114-00<br>60505-6115-02<br>63323-0125-50<br>70860-0205-50<br>55390-0391-50<br>55390-0391-10<br>68001-0282-26<br>68001-0282-27<br>68001-0282-25<br>55111-0686-07 |

|  |  |  |               |
|--|--|--|---------------|
|  |  |  | 55111-0687-25 |
|  |  |  | 63323-0102-13 |
|  |  |  | 63323-0125-53 |
|  |  |  | 63323-0102-10 |
|  |  |  | 63323-0126-00 |
|  |  |  | 23155-0213-31 |
|  |  |  | 23155-0214-31 |
|  |  |  | 00409-0187-01 |
|  |  |  | 00409-0185-01 |
|  |  |  | 00409-0183-01 |
|  |  |  | 00409-0186-01 |
|  |  |  | 00409-0182-01 |
|  |  |  | 00409-0181-01 |
|  |  |  | 71288-0114-50 |
|  |  |  | 71288-0113-10 |
|  |  |  | 67457-0616-10 |
|  |  |  | 00069-3858-10 |
|  |  |  | 67457-0462-01 |
|  |  |  | 67457-0617-30 |
|  |  |  | 67457-0618-10 |
|  |  |  | 16714-0909-01 |
|  |  |  | 16714-0930-01 |
|  |  |  | 25021-0209-50 |
|  |  |  | 25021-0208-10 |
|  |  |  | 25021-0239-26 |
|  |  |  | 25021-0239-05 |
|  |  |  | 25021-0239-52 |
|  |  |  | 47335-0154-40 |
|  |  |  | 47335-0153-40 |
|  |  |  | 00703-5775-01 |
|  |  |  | 00703-5778-01 |
|  |  |  | 45963-0619-59 |
|  |  |  | 45963-0612-57 |
|  |  |  | 45963-0623-57 |
|  |  |  | 45963-0636-60 |
|  |  |  | 45963-0624-58 |
|  |  |  | 00591-3563-55 |
|  |  |  | 00591-3562-79 |

|  |            |        |                                                                                                                                                                                                                                                                                                                                                                                                                                                                                                                            |
|--|------------|--------|----------------------------------------------------------------------------------------------------------------------------------------------------------------------------------------------------------------------------------------------------------------------------------------------------------------------------------------------------------------------------------------------------------------------------------------------------------------------------------------------------------------------------|
|  |            |        | 00069-3857-10<br>67457-0464-20<br>67457-0463-02<br>00069-3859-10<br>25021-0234-10<br>25021-0235-50<br>00781-3282-75<br>00781-3283-79<br>45963-0620-60<br>23155-0528-31<br>23155-0529-31<br>00409-0181-25<br>00409-0183-25<br>00409-0182-25<br>00002-7501-01<br>00002-7502-01<br>62756-0974-60<br>62756-0219-60<br>62756-0102-60<br>62756-0073-60<br>62756-0746-60<br>62756-0008-60<br>62756-0614-60<br>62756-0321-60<br>62756-0438-60<br>63323-0125-94<br>63323-0102-94<br>23155-0484-31<br>23155-0483-31<br>62756-0533-60 |
|  | Pemetrexed | Part B | J9305; C9213<br>00002-7640-01<br>00002-7623-01                                                                                                                                                                                                                                                                                                                                                                                                                                                                             |
|  | Paclitaxel | Part B | J9265; J9267;<br>C9431<br>00172-3756-95<br>00172-3753-96<br>00172-3754-94<br>00172-3756-75<br>00172-3753-77<br>00172-3754-73                                                                                                                                                                                                                                                                                                                                                                                               |

|  |  |  |               |
|--|--|--|---------------|
|  |  |  | 47781-0594-07 |
|  |  |  | 47781-0593-07 |
|  |  |  | 47781-0595-07 |
|  |  |  | 10518-0102-09 |
|  |  |  | 10518-0102-08 |
|  |  |  | 10518-0102-07 |
|  |  |  | 70860-0200-50 |
|  |  |  | 70860-0200-05 |
|  |  |  | 70860-0200-17 |
|  |  |  | 51991-0936-98 |
|  |  |  | 51991-0937-98 |
|  |  |  | 51991-0938-98 |
|  |  |  | 63323-0763-17 |
|  |  |  | 63323-0763-06 |
|  |  |  | 63323-0763-52 |
|  |  |  | 63323-0763-05 |
|  |  |  | 63323-0763-50 |
|  |  |  | 63323-0763-16 |
|  |  |  | 61703-0342-50 |
|  |  |  | 61703-0342-22 |
|  |  |  | 61703-0342-09 |
|  |  |  | 00074-4335-01 |
|  |  |  | 00074-4335-02 |
|  |  |  | 00074-4335-04 |
|  |  |  | 00069-0078-01 |
|  |  |  | 00069-0076-01 |
|  |  |  | 00069-0079-01 |
|  |  |  | 67457-0471-52 |
|  |  |  | 67457-0434-51 |
|  |  |  | 67457-0449-17 |
|  |  |  | 25021-0213-17 |
|  |  |  | 25021-0213-50 |
|  |  |  | 25021-0213-05 |
|  |  |  | 66758-0043-03 |
|  |  |  | 66758-0043-02 |
|  |  |  | 66758-0043-01 |
|  |  |  | 45963-0613-56 |
|  |  |  | 45963-0613-53 |

|  |  |  |               |
|--|--|--|---------------|
|  |  |  | 00555-1985-14 |
|  |  |  | 00555-1984-14 |
|  |  |  | 45963-0613-59 |
|  |  |  | 00703-4768-01 |
|  |  |  | 00703-4766-01 |
|  |  |  | 00703-4767-01 |
|  |  |  | 00703-4764-01 |
|  |  |  | 51079-0963-01 |
|  |  |  | 51079-0962-01 |
|  |  |  | 51079-0961-01 |
|  |  |  | 55390-0114-05 |
|  |  |  | 55390-0114-20 |
|  |  |  | 55390-0114-50 |
|  |  |  | 44567-0505-01 |
|  |  |  | 44567-0506-01 |
|  |  |  | 55390-0314-50 |
|  |  |  | 55390-0314-05 |
|  |  |  | 55390-0314-20 |
|  |  |  | 55390-0304-05 |
|  |  |  | 55390-0304-50 |
|  |  |  | 55390-0304-20 |
|  |  |  | 00172-3755-31 |
|  |  |  | 55390-0514-20 |
|  |  |  | 55390-0514-05 |
|  |  |  | 55390-0514-50 |
|  |  |  | 00703-4764-81 |
|  |  |  | 00703-4766-81 |
|  |  |  | 00703-4768-81 |
|  |  |  | 45963-0613-83 |
|  |  |  | 45963-0613-89 |
|  |  |  | 45963-0613-86 |
|  |  |  | 00015-3475-30 |
|  |  |  | 00015-3479-11 |
|  |  |  | 00015-3476-30 |
|  |  |  | 00015-3456-99 |
|  |  |  | 00015-3475-20 |
|  |  |  | 00015-3476-20 |

|                          |        |              |                                                                                                                                                                                                                                                                                                                                                                                                                                                                                                           |
|--------------------------|--------|--------------|-----------------------------------------------------------------------------------------------------------------------------------------------------------------------------------------------------------------------------------------------------------------------------------------------------------------------------------------------------------------------------------------------------------------------------------------------------------------------------------------------------------|
| Albumin-bound paclitaxel | Part B | J9264; C9127 | 68817-0134-50                                                                                                                                                                                                                                                                                                                                                                                                                                                                                             |
| Bevacizumab              | Part B | J9035        | 71266-8005-02<br>71266-8005-01<br>50242-0061-01<br>50242-0060-10<br>50242-0060-02<br>50242-0060-01<br>50242-0061-10                                                                                                                                                                                                                                                                                                                                                                                       |
| Docetaxel                | Part B | J9170; J9171 | 47335-0285-41<br>47335-0286-41<br>16729-0267-64<br>16729-0267-63<br>16729-0267-65<br>16729-0231-65<br>16729-0231-63<br>16729-0120-50<br>16729-0120-49<br>16729-0231-64<br>45963-0734-74<br>60505-6037-06<br>60505-6035-06<br>43066-0010-01<br>43066-0006-01<br>43066-0001-01<br>43598-0259-40<br>43598-0258-11<br>42367-0121-25<br>42367-0121-29<br>42367-0121-21<br>00409-0367-01<br>00409-0201-02<br>00409-0201-20<br>00409-0368-01<br>00409-0366-01<br>00409-0201-10<br>50742-0428-02<br>50742-0463-16 |



|  |  |  |               |
|--|--|--|---------------|
|  |  |  | 50742-0431-08 |
|  |  |  | 63739-0971-17 |
|  |  |  | 63739-0932-11 |
|  |  |  | 67457-0531-02 |
|  |  |  | 67457-0781-08 |
|  |  |  | 67457-0532-08 |
|  |  |  | 67457-0533-16 |
|  |  |  | 16714-0500-01 |
|  |  |  | 16714-0465-01 |
|  |  |  | 00069-9141-22 |
|  |  |  | 00069-9142-22 |
|  |  |  | 00069-9144-11 |
|  |  |  | 00069-9142-11 |
|  |  |  | 00069-9141-11 |
|  |  |  | 25021-0222-01 |
|  |  |  | 25021-0222-07 |
|  |  |  | 25021-0222-04 |
|  |  |  | 25021-0245-04 |
|  |  |  | 25021-0245-01 |
|  |  |  | 66758-0050-03 |
|  |  |  | 66758-0050-01 |
|  |  |  | 66758-0050-02 |
|  |  |  | 00703-5720-01 |
|  |  |  | 00703-5730-01 |
|  |  |  | 45963-0734-54 |
|  |  |  | 45963-0790-56 |
|  |  |  | 45963-0765-52 |
|  |  |  | 45963-0734-52 |
|  |  |  | 00955-1022-08 |
|  |  |  | 00955-1020-01 |
|  |  |  | 00955-1021-04 |
|  |  |  | 39822-2180-01 |
|  |  |  | 39822-2120-01 |
|  |  |  | 39822-2200-01 |
|  |  |  | 43598-0611-11 |
|  |  |  | 43598-0610-40 |
|  |  |  | 00409-0201-26 |
|  |  |  | 00409-0201-27 |

|  |                      |        |       |                                                                                                                                      |
|--|----------------------|--------|-------|--------------------------------------------------------------------------------------------------------------------------------------|
|  |                      |        |       | 00409-0201-25<br>66758-0950-02<br>66758-0950-04<br>66758-0950-03<br>00075-8001-20<br>00075-8004-04<br>00075-8003-01<br>00075-8001-80 |
|  | Cabozantinib         | Part D | NA    | 42388-0024-26<br>42388-0025-26<br>42388-0023-26<br>42388-0013-14<br>42388-0011-14<br>42388-0012-14                                   |
|  | Vandetanib           | Part D | NA    | 58468-7820-03<br>58468-7840-03<br>00310-7840-30<br>00310-7820-30<br>00310-7810-30<br>00310-7830-30                                   |
|  | Bevacizumab-<br>awwb | Part B | Q5107 | 55513-0207-01<br>55513-0206-01                                                                                                       |

**eTable 2. Systemic Therapies for Colorectal Cancer**

| <b>Therapeutic class</b>                         | <b>Drug name</b>       | <b>Part B or D</b> | <b>HCPCS Code(s)</b> | <b>NDC Codes</b>                                                                                                                                                                        |
|--------------------------------------------------|------------------------|--------------------|----------------------|-----------------------------------------------------------------------------------------------------------------------------------------------------------------------------------------|
| <b>Targeted therapies</b>                        | Cetuximab              | Part B             | J9055                | 66733-0958-23<br>66733-0948-23                                                                                                                                                          |
|                                                  | Panitumumab            | Part B             | J9303; C9235         | 55513-0954-01<br>55513-0956-01<br>55513-0955-01                                                                                                                                         |
|                                                  | Dabrafenib             | Part D             | NA                   | 00173-0847-08<br>00078-0682-66<br>00173-0846-08<br>00078-0681-66                                                                                                                        |
|                                                  | Trametinib             | Part D             | NA                   | 00078-0668-15<br>00173-0849-13<br>00078-0666-15<br>00173-0848-13                                                                                                                        |
|                                                  | Vemurafenib            | Part D             | NA                   | 50242-0090-02<br>50242-0090-01                                                                                                                                                          |
|                                                  | <b>Immunotherapies</b> | Pembrolizumab      | Part B               | C9027; J9271                                                                                                                                                                            |
| Ipilimumab                                       |                        | Part B             | J9228; C9284         | 00003-2328-22<br>00003-2327-11                                                                                                                                                          |
| Nivolumab                                        |                        | Part B             | C9453; J9299         | 00003-3774-12<br>00003-3734-13<br>00003-3772-11                                                                                                                                         |
| <b>Chemotherapy and other systemic therapies</b> | Oxaliplatin            | Part B             | J9263; C9205         | 00024-0592-40<br>00024-0596-02<br>00024-0597-04<br>00024-0590-10<br>00024-0591-20<br>16729-0332-05<br>16729-0332-03<br>60505-6132-07<br>60505-6132-06<br>70860-0201-10<br>70860-0201-20 |

|  |  |  |               |
|--|--|--|---------------|
|  |  |  | 43066-0018-01 |
|  |  |  | 43066-0014-01 |
|  |  |  | 68001-0341-29 |
|  |  |  | 68001-0341-28 |
|  |  |  | 68001-0341-37 |
|  |  |  | 68001-0341-36 |
|  |  |  | 51991-0923-98 |
|  |  |  | 51991-0922-98 |
|  |  |  | 51991-0219-98 |
|  |  |  | 51991-0218-98 |
|  |  |  | 63323-0175-30 |
|  |  |  | 63323-0176-50 |
|  |  |  | 63323-0650-17 |
|  |  |  | 63323-0650-27 |
|  |  |  | 63323-0650-20 |
|  |  |  | 63323-0650-10 |
|  |  |  | 63323-0750-20 |
|  |  |  | 63323-0750-10 |
|  |  |  | 63323-0211-10 |
|  |  |  | 63323-0212-20 |
|  |  |  | 61703-0363-18 |
|  |  |  | 61703-0363-40 |
|  |  |  | 61703-0363-22 |
|  |  |  | 50742-0405-10 |
|  |  |  | 50742-0406-20 |
|  |  |  | 71288-0101-20 |
|  |  |  | 71288-0101-10 |
|  |  |  | 00069-1010-01 |
|  |  |  | 00069-0074-01 |
|  |  |  | 67457-0442-20 |
|  |  |  | 67457-0469-10 |
|  |  |  | 00069-0070-01 |
|  |  |  | 00069-0067-01 |
|  |  |  | 67457-0476-10 |
|  |  |  | 72603-0301-01 |
|  |  |  | 16714-0728-01 |
|  |  |  | 16714-0727-01 |
|  |  |  | 72603-0101-01 |

|  |      |        |       |               |
|--|------|--------|-------|---------------|
|  |      |        |       | 25021-0212-50 |
|  |      |        |       | 25021-0233-10 |
|  |      |        |       | 25021-0233-20 |
|  |      |        |       | 25021-0211-20 |
|  |      |        |       | 00781-3315-70 |
|  |      |        |       | 00781-3317-80 |
|  |      |        |       | 66758-0053-02 |
|  |      |        |       | 66758-0053-01 |
|  |      |        |       | 47335-0046-40 |
|  |      |        |       | 47335-0178-40 |
|  |      |        |       | 41616-0176-40 |
|  |      |        |       | 47335-0176-40 |
|  |      |        |       | 41616-0178-40 |
|  |      |        |       | 47335-0047-40 |
|  |      |        |       | 45963-0637-49 |
|  |      |        |       | 45963-0638-58 |
|  |      |        |       | 45963-0611-53 |
|  |      |        |       | 00703-3985-01 |
|  |      |        |       | 00703-3986-01 |
|  |      |        |       | 45963-0611-59 |
|  |      |        |       | 00955-1725-10 |
|  |      |        |       | 00955-1727-20 |
|  |      |        |       | 00781-9317-80 |
|  |      |        |       | 00781-9315-70 |
|  |      |        |       | 00955-1731-10 |
|  |      |        |       | 00955-1733-20 |
|  | 5-FU | Part B | J9190 | 63370-0095-35 |
|  |      |        |       | 63370-0095-15 |
|  |      |        |       | 63370-0095-25 |
|  |      |        |       | 49452-3175-04 |
|  |      |        |       | 49452-3175-01 |
|  |      |        |       | 49452-3175-03 |
|  |      |        |       | 49452-3175-05 |
|  |      |        |       | 49452-3175-02 |
|  |      |        |       | 00013-1046-94 |
|  |      |        |       | 00013-1036-91 |
|  |      |        |       | 00013-1056-94 |
|  |      |        |       | 00703-3019-11 |

|  |  |  |               |
|--|--|--|---------------|
|  |  |  | 00703-3018-12 |
|  |  |  | 00703-3015-13 |
|  |  |  | 00703-3019-12 |
|  |  |  | 00703-3015-11 |
|  |  |  | 00187-5200-30 |
|  |  |  | 54868-5450-00 |
|  |  |  | 00066-7150-30 |
|  |  |  | 54569-1100-00 |
|  |  |  | 54569-1566-00 |
|  |  |  | 00187-3204-47 |
|  |  |  | 54868-0951-00 |
|  |  |  | 54868-0951-01 |
|  |  |  | 60346-0548-81 |
|  |  |  | 58016-2017-01 |
|  |  |  | 00187-3202-10 |
|  |  |  | 00187-3202-02 |
|  |  |  | 00187-3203-10 |
|  |  |  | 00187-3203-02 |
|  |  |  | 00187-3204-26 |
|  |  |  | 00187-3600-60 |
|  |  |  | 54569-1565-00 |
|  |  |  | 00023-0810-30 |
|  |  |  | 16110-0812-30 |
|  |  |  | 00023-0812-30 |
|  |  |  | 58016-9106-01 |
|  |  |  | 54569-1406-00 |
|  |  |  | 54569-6279-00 |
|  |  |  | 16729-0276-11 |
|  |  |  | 16729-0276-38 |
|  |  |  | 16729-0276-67 |
|  |  |  | 16729-0276-68 |
|  |  |  | 16729-0276-03 |
|  |  |  | 10019-0950-02 |
|  |  |  | 68001-0266-30 |
|  |  |  | 68001-0266-27 |
|  |  |  | 68001-0266-31 |
|  |  |  | 68001-0266-32 |
|  |  |  | 51552-0733-05 |

|  |  |  |               |
|--|--|--|---------------|
|  |  |  | 51552-0733-01 |
|  |  |  | 51552-0733-02 |
|  |  |  | 51552-0733-04 |
|  |  |  | 63323-0117-20 |
|  |  |  | 63323-0117-10 |
|  |  |  | 63323-0117-51 |
|  |  |  | 63323-0117-61 |
|  |  |  | 00469-1710-60 |
|  |  |  | 00469-1711-00 |
|  |  |  | 00469-1710-30 |
|  |  |  | 00469-1710-40 |
|  |  |  | 10139-0063-10 |
|  |  |  | 10139-0063-20 |
|  |  |  | 51432-0409-10 |
|  |  |  | 51432-0470-10 |
|  |  |  | 00395-8080-62 |
|  |  |  | 00395-8080-19 |
|  |  |  | 62991-1486-03 |
|  |  |  | 62991-1486-01 |
|  |  |  | 62991-1486-02 |
|  |  |  | 62991-1486-04 |
|  |  |  | 51862-0362-40 |
|  |  |  | 66530-0249-40 |
|  |  |  | 61703-0409-67 |
|  |  |  | 61703-0409-53 |
|  |  |  | 61703-0409-32 |
|  |  |  | 38779-3185-06 |
|  |  |  | 38779-0025-10 |
|  |  |  | 38779-0025-01 |
|  |  |  | 38779-0025-25 |
|  |  |  | 38779-0025-06 |
|  |  |  | 38779-0025-03 |
|  |  |  | 38779-0025-09 |
|  |  |  | 38779-0025-05 |
|  |  |  | 38779-0025-04 |
|  |  |  | 38779-3185-05 |
|  |  |  | 38779-3185-09 |
|  |  |  | 38779-3185-01 |

|  |  |  |               |
|--|--|--|---------------|
|  |  |  | 38779-3185-04 |
|  |  |  | 38779-3185-03 |
|  |  |  | 10139-0063-01 |
|  |  |  | 10139-0063-11 |
|  |  |  | 10139-0063-50 |
|  |  |  | 10139-0063-12 |
|  |  |  | 00378-4791-06 |
|  |  |  | 66530-0258-30 |
|  |  |  | 68682-0004-31 |
|  |  |  | 68682-0085-31 |
|  |  |  | 21695-0829-40 |
|  |  |  | 54868-6293-00 |
|  |  |  | 51927-1085-00 |
|  |  |  | 51309-0217-50 |
|  |  |  | 51309-0217-98 |
|  |  |  | 51309-0217-20 |
|  |  |  | 25021-0215-98 |
|  |  |  | 25021-0215-99 |
|  |  |  | 66758-0044-03 |
|  |  |  | 66758-0044-01 |
|  |  |  | 43547-0259-01 |
|  |  |  | 43547-0258-01 |
|  |  |  | 39769-0012-90 |
|  |  |  | 39769-0012-10 |
|  |  |  | 39769-0012-40 |
|  |  |  | 51672-4063-01 |
|  |  |  | 51672-4118-06 |
|  |  |  | 51672-4062-01 |
|  |  |  | 00187-3953-64 |
|  |  |  | 00702-1710-30 |
|  |  |  | 63323-0117-69 |
|  |  |  | 63323-0117-19 |
|  |  |  | 63323-0117-59 |
|  |  |  | 63323-0117-58 |
|  |  |  | 63323-0117-18 |
|  |  |  | 63323-0117-28 |
|  |  |  | 63323-0117-68 |
|  |  |  | 64370-0421-40 |



|              |                                                                              |                                                        |                                                                                                                                                                                                                                                                                                                                                                                                                                                                                                                                                                                                                                                   |
|--------------|------------------------------------------------------------------------------|--------------------------------------------------------|---------------------------------------------------------------------------------------------------------------------------------------------------------------------------------------------------------------------------------------------------------------------------------------------------------------------------------------------------------------------------------------------------------------------------------------------------------------------------------------------------------------------------------------------------------------------------------------------------------------------------------------------------|
|              |                                                                              |                                                        | 28105-0421-40                                                                                                                                                                                                                                                                                                                                                                                                                                                                                                                                                                                                                                     |
| Capecitabine | Part B (note-oral drug-check for HCPCS codes AND check for NDCs in DME file) | J8520; J8521; WW089; WW090; WW091; WW093; WW094; WW096 | 16729-0072-12<br>16729-0073-29<br>60687-0149-11<br>60687-0149-94<br>65162-0844-16<br>65162-0843-06<br>72485-0204-60<br>72485-0205-12<br>67877-0458-60<br>67877-0459-12<br>59651-0205-08<br>59651-0204-60<br>42291-0167-12<br>42291-0166-60<br>42291-0190-60<br>42291-0191-12<br>72606-0554-01<br>72606-0555-01<br>69097-0949-03<br>69097-0948-08<br>51407-0095-60<br>51407-0096-12<br>00054-0271-21<br>00054-0272-23<br>51079-0510-01<br>51079-0510-05<br>00378-2512-78<br>00378-2511-91<br>16714-0467-01<br>16714-0468-01<br>72205-0006-60<br>72205-0007-92<br>64980-0277-12<br>64980-0276-06<br>62756-0239-20<br>62756-0238-86<br>00093-7474-89 |

|             |        |              |                                                                                                                                                                                                                                                                                                                                                                                                     |
|-------------|--------|--------------|-----------------------------------------------------------------------------------------------------------------------------------------------------------------------------------------------------------------------------------------------------------------------------------------------------------------------------------------------------------------------------------------------------|
|             |        |              | 00093-7473-06<br>50268-0154-11<br>50268-0154-13<br>54569-5717-00<br>00004-1100-20<br>00004-1101-50<br>00004-1101-75<br>54868-4143-03<br>54868-4143-01<br>54868-5260-04<br>54868-5260-05<br>54868-5260-06<br>54868-5260-07<br>54868-5260-08<br>54868-5260-09<br>54868-5260-00<br>54868-5260-01<br>54868-5260-03<br>54868-4143-00<br>54868-4143-02<br>54868-5260-02<br>00004-1100-51<br>00004-1101-16 |
| Ramucirumab | Part B | C9025; J9308 | 00002-7678-01<br>00002-7669-01                                                                                                                                                                                                                                                                                                                                                                      |
| Bevacizumab | Part B | J9035        | 71266-8005-02<br>71266-8005-01<br>50242-0061-01<br>50242-0060-10<br>50242-0060-02<br>50242-0060-01<br>50242-0061-10                                                                                                                                                                                                                                                                                 |
| Irinotecan  | Part B | J9206        | 61703-0349-61<br>61703-0349-62<br>00009-7529-01<br>00009-7529-02<br>00009-7529-05<br>00009-7529-04                                                                                                                                                                                                                                                                                                  |

|  |  |  |               |
|--|--|--|---------------|
|  |  |  | 00009-7529-03 |
|  |  |  | 00009-1111-01 |
|  |  |  | 00009-1111-02 |
|  |  |  | 00143-9583-01 |
|  |  |  | 00703-4434-91 |
|  |  |  | 18111-0002-02 |
|  |  |  | 18111-0002-03 |
|  |  |  | 60505-6128-00 |
|  |  |  | 60505-6128-01 |
|  |  |  | 10518-0103-10 |
|  |  |  | 10518-0103-11 |
|  |  |  | 59923-0714-02 |
|  |  |  | 59923-0715-05 |
|  |  |  | 59923-0702-02 |
|  |  |  | 59923-0702-05 |
|  |  |  | 72485-0212-05 |
|  |  |  | 72485-0211-02 |
|  |  |  | 55390-0295-01 |
|  |  |  | 55390-0296-01 |
|  |  |  | 68001-0284-34 |
|  |  |  | 68001-0284-25 |
|  |  |  | 63323-0193-02 |
|  |  |  | 63323-0193-05 |
|  |  |  | 63323-0193-52 |
|  |  |  | 63323-0193-55 |
|  |  |  | 59762-7529-01 |
|  |  |  | 59762-7529-02 |
|  |  |  | 23155-0179-32 |
|  |  |  | 23155-0179-31 |
|  |  |  | 00143-9701-01 |
|  |  |  | 00143-9702-01 |
|  |  |  | 61703-0349-09 |
|  |  |  | 61703-0349-16 |
|  |  |  | 61703-0349-36 |
|  |  |  | 50742-0402-05 |
|  |  |  | 50742-0401-02 |
|  |  |  | 16714-0725-01 |
|  |  |  | 16714-0726-01 |

|  |                        |        |                                                                                                                                                                                                                                                                                                                                                                                                                                       |
|--|------------------------|--------|---------------------------------------------------------------------------------------------------------------------------------------------------------------------------------------------------------------------------------------------------------------------------------------------------------------------------------------------------------------------------------------------------------------------------------------|
|  |                        |        | 25021-0230-05<br>25021-0214-05<br>25021-0214-02<br>25021-0230-02<br>25021-0200-02<br>25021-0200-05<br>66758-0048-01<br>00781-3066-72<br>00781-3066-75<br>66758-0048-02<br>00703-4432-11<br>00703-4437-11<br>00703-4434-11<br>45963-0614-55<br>45963-0614-51<br>00591-3189-02<br>00591-3189-26<br>10019-0934-02<br>10019-0934-01<br>10019-0934-79<br>10019-0934-17<br>00703-4432-81<br>45963-0614-85<br>45963-0614-81<br>00703-4434-81 |
|  | Regorafenib            | Part D | NA<br>50419-0171-01<br>50419-0171-03                                                                                                                                                                                                                                                                                                                                                                                                  |
|  | Trifluridine/tipiracil | Part D | NA<br>64842-1025-01<br>64842-1025-03<br>64842-1020-02<br>64842-1020-01<br>64842-1020-03<br>64842-1025-02                                                                                                                                                                                                                                                                                                                              |

**eTable 3. Billing Codes for Lung Cancer Resection Surgeries**

| <b>CPT Code</b> | <b>Definition</b>                                                                                                                                                                 |
|-----------------|-----------------------------------------------------------------------------------------------------------------------------------------------------------------------------------|
| 32440           | Removal of lung, pneumonectomy                                                                                                                                                    |
| 32442           | Removal of lung, pneumonectomy; with resection of segment of trachea followed by broncho-tracheal anastomosis (sleeve pneumonectomy)                                              |
| 32445           | Removal of lung, pneumonectomy; extrapleural                                                                                                                                      |
| 32480           | Removal of lung, other than pneumonectomy; single lobe (lobectomy)                                                                                                                |
| 32482           | Removal of lung, other than pneumonectomy; 2 lobes (bilobectomy)                                                                                                                  |
| 32484           | Removal of lung, other than pneumonectomy; single segment (segmentectomy)                                                                                                         |
| 32486           | Removal of lung, other than pneumonectomy; with circumferential resection of segment of bronchus followed by broncho-bronchial anastomosis (sleeve lobectomy)                     |
| 32488           | Removal of lung, other than pneumonectomy; with all remaining lung following previous removal of a portion of lung (completion pneumonectomy)                                     |
| 32663           | Thoracoscopy, surgical; with lobectomy (single lobe)                                                                                                                              |
| 32500           | Removal of lung, other than total pneumonectomy; wedge resection, single or multiple                                                                                              |
| 32505           | Thoracotomy; with therapeutic wedge resection (eg, mass, nodule), initial                                                                                                         |
| 32506           | Thoracotomy; with therapeutic wedge resection (eg, mass or nodule), each additional resection, ipsilateral (List separately in addition to code for primary procedure)            |
| 32507           | Thoracotomy; with diagnostic wedge resection followed by anatomic lung resection (List separately in addition to code for primary procedure)                                      |
| 32657           | Thoracoscopy, surgical; with wedge resection of lung, single or multiple                                                                                                          |
| 32666           | Thoracoscopy, surgical; with therapeutic wedge resection (eg, mass, nodule), initial unilateral                                                                                   |
| 32667           | Thoracoscopy, surgical; with therapeutic wedge resection (eg, mass or nodule), each additional resection, ipsilateral (List separately in addition to code for primary procedure) |
| 32668           | Thoracoscopy, surgical; with diagnostic wedge resection followed by anatomic lung resection (List separately in addition to code for primary procedure)                           |
| 32669           | thoracoscopy, surgical; with removal of a single lung segment (segmentectomy)                                                                                                     |
| 32670           | Thoracoscopy, surgical; with removal of two lobes (bilobectomy)                                                                                                                   |
| 32671           | Thoracoscopy, surgical; with removal of lung (pneumonectomy)                                                                                                                      |

| <b>ICD-9<br/>Procedure<br/>Code</b>  | <b>Definition</b>                                                     |
|--------------------------------------|-----------------------------------------------------------------------|
| 32.20                                | thoroscopic excision of lesion or tissue of lung                      |
| 32.28                                | endoscopic excision or destruction of lesion or tissue of lung        |
| 32.29                                | other local excisions or destruction of lesions or tissue of lung     |
| 32.50                                | thoroscopic pneumonectomy                                             |
| 32.59                                | other and unspecified pneumonectomy                                   |
| 32.41                                | Thoracoscopic lobectomy of lung                                       |
| 32.49                                | Other lobectomy of lung                                               |
| 32.30                                | Thoracoscopic segmental resection of lung                             |
| 32.39                                | Other and unspecified segmental resection of lung                     |
| <b>ICD-10<br/>Procedure<br/>Code</b> | <b>Definition</b>                                                     |
| 0BTK4ZZ                              | Resection of Right Lung, Percutaneous Endoscopic Approach             |
| 0BTL4ZZ                              | Resection of Left Lung, Percutaneous Endoscopic Approach              |
| 0BTM4ZZ                              | Resection of Bilateral Lungs, Percutaneous Endoscopic Approach        |
| 0BTK0ZZ                              | Resection of Right Lung, Open Approach                                |
| 0BTL0ZZ                              | Resection of Left Lung, Open Approach                                 |
| 0BTM0ZZ                              | Resection of Bilateral Lungs, Open Approach                           |
| 0BTC4ZZ                              | Resection of Right Upper Lung Lobe, Percutaneous Endoscopic Approach  |
| 0BTD4ZZ                              | Resection of Right Middle Lung Lobe, Percutaneous Endoscopic Approach |
| 0BTF4ZZ                              | Resection of Right Lower Lung Lobe, Percutaneous Endoscopic Approach  |
| 0BTG4ZZ                              | Resection of Left Upper Lung Lobe, Percutaneous Endoscopic Approach   |
| 0BTJ4ZZ                              | Resection of Left Lower Lung Lobe, Percutaneous Endoscopic Approach   |
| 0BTC0ZZ                              | Resection of Right Upper Lung Lobe, Open Approach                     |
| 0BTD0ZZ                              | Resection of Right Middle Lung Lobe, Open Approach                    |
| 0BTF0ZZ                              | Resection of Right Lower Lung Lobe, Open Approach                     |
| 0BTG0ZZ                              | Resection of Left Upper Lung Lobe, Open Approach                      |
| 0BTJ0ZZ                              | Resection of Left Lower Lung Lobe, Open Approach                      |
| 0BBC4ZZ                              | Excision of Right Upper Lung Lobe, Percutaneous Endoscopic Approach   |
| 0BBC0ZZ                              | Excision of right upper lung, open approach                           |
| 0BBD4ZZ                              | Excision of Right Middle Lung Lobe, Percutaneous Endoscopic Approach  |
| 0BBD0ZZ                              | Excision of right middle lung lobe, open approach                     |
| 0BBF4ZZ                              | Excision of Right Lower Lung Lobe, Percutaneous Endoscopic Approach   |
| 0BBF0ZZ                              | Excision of right lower lung lobe, open approach                      |
| 0BBG4ZZ                              | Excision of Left Upper Lung Lobe, Percutaneous Endoscopic Approach    |
| 0BBG0ZZ                              | Excision of left upper lung lobe, open approach                       |
| 0BBH4ZZ                              | Excision of Lung Lingula, Percutaneous Endoscopic Approach            |
| 0BBH0ZZ                              | Excision of lung lingula, open approach                               |

|         |                                                                    |
|---------|--------------------------------------------------------------------|
| 0BBJ4ZZ | Excision of Left Lower Lung Lobe, Percutaneous Endoscopic Approach |
| 0BBJ0ZZ | Excision of left lower lung lobe, open approach                    |
| 0BBK4ZZ | Excision of Right Lung, Percutaneous Endoscopic Approach           |
| 0BBL4ZZ | Excision of Left Lung, Percutaneous Endoscopic Approach            |
| 0BTH4ZZ | Resection of Lung Lingula, Percutaneous Endoscopic Approach        |
| 0BTH0ZZ | Resection of lung lingula, open approach                           |
| 0BBK0ZZ | Excision of Right Lung, Open Approach                              |
| 0BBK3ZZ | Excision of Right Lung, Percutaneous Approach                      |
| 0BBL0ZZ | Excision of Left Lung, Open Approach                               |
| 0BBM0ZZ | Excision of Bilateral Lungs, Open Approach                         |
| 0BBM4ZZ | Excision of Bilateral Lungs, Perc Endo Approach                    |

**eTable 4. Billing Codes for Radiation Therapy**

| Radiation Type | Code Type | Code  | Description                                                                                                                                                                  |
|----------------|-----------|-------|------------------------------------------------------------------------------------------------------------------------------------------------------------------------------|
| EBRT           | CPT       | 77401 | Radiation treatment delivery, superficial and/or ortho voltage, per day                                                                                                      |
| EBRT           | CPT       | 77402 | Radiation treatment delivery, =>1 MeV; simple                                                                                                                                |
| EBRT           | CPT       | 77403 | Radiation treatment delivery, single treatment area, single port or parallel opposed ports, simple blocks or no blocks; 6-10 MeV                                             |
| EBRT           | CPT       | 77404 | Radiation treatment delivery, single treatment area, single port or parallel opposed ports, simple blocks or no blocks; 11-19 MeV                                            |
| EBRT           | CPT       | 77406 | Radiation treatment delivery, single treatment area, single port or parallel opposed ports, simple blocks or no blocks; 20 MeV or greater                                    |
| EBRT           | CPT       | 77407 | Radiation treatment delivery, =>1 MeV; intermediate                                                                                                                          |
| EBRT           | CPT       | 77408 | Radiation treatment delivery, 2 separate treatment areas, 3 or more ports on a single treatment area, use of multiple blocks; 6-10 MeV                                       |
| EBRT           | CPT       | 77409 | Radiation treatment delivery, 2 separate treatment areas, 3 or more ports on a single treatment area, use of multiple blocks; 11-19 MeV                                      |
| EBRT           | CPT       | 77411 | Radiation treatment delivery, 2 separate treatment areas, 3 or more ports on a single treatment area, use of multiple blocks; 20 MeV or greater                              |
| EBRT           | CPT       | 77412 | Radiation treatment delivery, =>1 MeV; complex                                                                                                                               |
| EBRT           | CPT       | 77413 | Radiation treatment delivery, 3 or more separate treatment areas, custom blocking, tangential ports, wedges, rotational beam, compensators, electron beam; 6-10 MeV          |
| EBRT           | CPT       | 77414 | Radiation treatment delivery, 3 or more separate treatment areas, custom blocking, tangential ports, wedges, rotational beam, compensators, electron beam; 11-19 MeV         |
| EBRT           | CPT       | 77416 | Radiation treatment delivery, 3 or more separate treatment areas, custom blocking, tangential ports, wedges, rotational beam, compensators, electron beam; 20 MeV or greater |
| Proton         | CPT       | 77522 | Proton treatment delivery; simple, with compensation                                                                                                                         |
| Proton         | CPT       | 77523 | Proton treatment delivery; intermediate                                                                                                                                      |
| Proton         | CPT       | 77525 | Proton treatment delivery; complex                                                                                                                                           |
| 3DCRT          | CPT       | 4165F | 3-dimensional conformal radiotherapy (3DCRT-CRT) or intensity modulated radiation therapy (IMRT) received (PRCA)                                                             |
| 3DCRT          | CPT       | 4181F | Conformal radiation therapy received (NMA-No Measure Associated)                                                                                                             |
| Proton         | CPT       | 77520 | Proton treatment delivery; simple, without compensation                                                                                                                      |
| EBRT           | HCPCS     | G6003 | Radiation treatment delivery, single treatment area, single port or parallel opposed ports, simple blocks or no blocks: up to 5 mev                                          |
| EBRT           | HCPCS     | G6004 | Radiation treatment delivery, single treatment area, single port or parallel opposed ports, simple blocks or no blocks: 6-10 mev                                             |
| EBRT           | HCPCS     | G6005 | Radiation treatment delivery, single treatment area, single port or parallel opposed ports, simple blocks or no blocks: 11-19 mev                                            |
| EBRT           | HCPCS     | G6006 | Radiation treatment delivery, single treatment area, single port or parallel opposed ports, simple blocks or no blocks: 20 mev or greater                                    |
| EBRT           | HCPCS     | G6007 | Radiation treatment delivery, 2 separate treatment areas, 3 or more ports on a single treatment area, use of multiple blocks: up to 5 mev                                    |
| EBRT           | HCPCS     | G6008 | Radiation treatment delivery, 2 separate treatment areas, 3 or more ports on a single treatment area, use of multiple blocks: 6-10 mev                                       |
| EBRT           | HCPCS     | G6009 | Radiation treatment delivery, 2 separate treatment areas, 3 or more ports on a single treatment area, use of multiple blocks: 11-19 mev                                      |



|        |       |         |                                                                                                                                                                                                         |
|--------|-------|---------|---------------------------------------------------------------------------------------------------------------------------------------------------------------------------------------------------------|
| EBRT   | HCPCS | G6010   | Radiation treatment delivery, 2 separate treatment areas, 3 or more ports on a single treatment area, use of multiple blocks: 20 mev or greater                                                         |
| EBRT   | HCPCS | G6011   | Radiation treatment delivery, 3 or more separate treatment areas, custom blocking, tangential ports, wedges, rotational beam, compensators, electron beam; up to 5 mev                                  |
| EBRT   | HCPCS | G6012   | Radiation treatment delivery, 3 or more separate treatment areas, custom blocking, tangential ports, wedges, rotational beam, compensators, electron beam; 6-10 mev                                     |
| EBRT   | HCPCS | G6013   | Radiation treatment delivery, 3 or more separate treatment areas, custom blocking, tangential ports, wedges, rotational beam, compensators, electron beam; 11-19 mev                                    |
| EBRT   | HCPCS | G6014   | Radiation treatment delivery, 3 or more separate treatment areas, custom blocking, tangential ports, wedges, rotational beam, compensators, electron beam; 20 mev or greater                            |
| EBRT   | HCPCS | G6017   | Intra-fraction localization and tracking of target or patient motion during delivery of radiation therapy (e.g., 3DCRT positional tracking, gating, 3DCRT surface tracking), each fraction of treatment |
| EBRT   | ICD9  | 92.24   | Teleradiotherapy Using Photons                                                                                                                                                                          |
| EBRT   | ICD9  | 92.25   | Teleradiotherapy Using Electrons                                                                                                                                                                        |
| EBRT   | ICD9  | 92.26   | Teleradiotherapy Of Other Particulate Radiation                                                                                                                                                         |
| EBRT   | ICD9  | 92.29   | Other Radiotherapeutic Procedure                                                                                                                                                                        |
| EBRT   | ICD10 | D7050ZZ | Beam Radiation of Thorax Lymphatics using Photons <1 MeV                                                                                                                                                |
| EBRT   | ICD10 | D7051ZZ | Beam Radiation of Thorax Lymphatics using Photons 1 - 10 MeV                                                                                                                                            |
| EBRT   | ICD10 | D7052ZZ | Beam Radiation of Thorax Lymphatics using Photons >10 MeV                                                                                                                                               |
| EBRT   | ICD10 | D7053Z0 | Beam Radiation of Thorax Lymphatics using Electrons, Intraop                                                                                                                                            |
| EBRT   | ICD10 | D7053ZZ | Beam Radiation of Thorax Lymphatics using Electrons                                                                                                                                                     |
| Proton | ICD10 | D7054ZZ | Beam Radiation of Thorax Lymphatics using Heavy Particles                                                                                                                                               |
| EBRT   | ICD10 | D7055ZZ | Beam Radiation of Thorax Lymphatics using Neutrons                                                                                                                                                      |
| EBRT   | ICD10 | DB000ZZ | Beam Radiation of Trachea using Photons <1 MeV                                                                                                                                                          |
| EBRT   | ICD10 | DB001ZZ | Beam Radiation of Trachea using Photons 1 - 10 MeV                                                                                                                                                      |
| EBRT   | ICD10 | DB002ZZ | Beam Radiation of Trachea using Photons >10 MeV                                                                                                                                                         |
| EBRT   | ICD10 | DB003Z0 | Beam Radiation of Trachea using Electrons, Intraoperative                                                                                                                                               |
| EBRT   | ICD10 | DB003ZZ | Beam Radiation of Trachea using Electrons                                                                                                                                                               |
| Proton | ICD10 | DB004ZZ | Beam Radiation of Trachea using Heavy Particles                                                                                                                                                         |
| EBRT   | ICD10 | DB005ZZ | Beam Radiation of Trachea using Neutrons                                                                                                                                                                |
| EBRT   | ICD10 | DB010ZZ | Beam Radiation of Bronchus using Photons <1 MeV                                                                                                                                                         |
| EBRT   | ICD10 | DB011ZZ | Beam Radiation of Bronchus using Photons 1 - 10 MeV                                                                                                                                                     |
| EBRT   | ICD10 | DB012ZZ | Beam Radiation of Bronchus using Photons >10 MeV                                                                                                                                                        |
| EBRT   | ICD10 | DB013Z0 | Beam Radiation of Bronchus using Electrons, Intraoperative                                                                                                                                              |
| EBRT   | ICD10 | DB013ZZ | Beam Radiation of Bronchus using Electrons                                                                                                                                                              |
| Proton | ICD10 | DB014ZZ | Beam Radiation of Bronchus using Heavy Particles                                                                                                                                                        |
| EBRT   | ICD10 | DB015ZZ | Beam Radiation of Bronchus using Neutrons                                                                                                                                                               |
| EBRT   | ICD10 | DB020ZZ | Beam Radiation of Lung using Photons <1 MeV                                                                                                                                                             |
| EBRT   | ICD10 | DB021ZZ | Beam Radiation of Lung using Photons 1 - 10 MeV                                                                                                                                                         |
| EBRT   | ICD10 | DB022ZZ | Beam Radiation of Lung using Photons >10 MeV                                                                                                                                                            |
| EBRT   | ICD10 | DB023Z0 | Beam Radiation of Lung using Electrons, Intraoperative                                                                                                                                                  |
| EBRT   | ICD10 | DB023ZZ | Beam Radiation of Lung using Electrons                                                                                                                                                                  |
| Proton | ICD10 | DB024ZZ | Beam Radiation of Lung using Heavy Particles (Protons,Ions)                                                                                                                                             |
| EBRT   | ICD10 | DB025ZZ | Beam Radiation of Lung using Neutrons                                                                                                                                                                   |
| EBRT   | ICD10 | DB050ZZ | Beam Radiation of Pleura using Photons <1 MeV                                                                                                                                                           |
| EBRT   | ICD10 | DB051ZZ | Beam Radiation of Pleura using Photons 1 - 10 MeV                                                                                                                                                       |
| EBRT   | ICD10 | DB052ZZ | Beam Radiation of Pleura using Photons >10 MeV                                                                                                                                                          |

|        |       |         |                                                              |
|--------|-------|---------|--------------------------------------------------------------|
| EBRT   | ICD10 | DB053Z0 | Beam Radiation of Pleura using Electrons, Intraoperative     |
| EBRT   | ICD10 | DB053ZZ | Beam Radiation of Pleura using Electrons                     |
| Proton | ICD10 | DB054ZZ | Beam Radiation of Pleura using Heavy Particles               |
| EBRT   | ICD10 | DB055ZZ | Beam Radiation of Pleura using Neutrons                      |
| EBRT   | ICD10 | DW020ZZ | Beam Radiation of Chest using Photons <1 MeV                 |
| EBRT   | ICD10 | DW021ZZ | Beam Radiation of Chest using Photons 1 - 10 MeV             |
| EBRT   | ICD10 | DW022ZZ | Beam Radiation of Chest using Photons >10 MeV                |
| EBRT   | ICD10 | DW023Z0 | Beam Radiation of Chest using Electrons, Intraoperative      |
| EBRT   | ICD10 | DW023ZZ | Beam Radiation of Chest using Electrons                      |
| Proton | ICD10 | DW024ZZ | Beam Radiation of Chest using Heavy Particles (Protons,Ions) |
| EBRT   | ICD10 | DW025ZZ | Beam Radiation of Chest using Neutrons                       |

**eTable 5. Billing Codes for Colorectal Cancer Resection Surgeries**

| <b>CPT Code</b> | <b>Definition</b>                                                                                                                                                                                        |
|-----------------|----------------------------------------------------------------------------------------------------------------------------------------------------------------------------------------------------------|
| 44140           | Colectomy, partial; with anastomosis                                                                                                                                                                     |
| 44141           | Colectomy, partial; with skin level cecostomy or colostomy                                                                                                                                               |
| 44143           | Colectomy, partial; with end colostomy and closure of distal segment (Hartman type procedure)                                                                                                            |
| 44144           | Colectomy, partial; with resection, with colostomy or ileostomy and creation of mucofistula                                                                                                              |
| 44145           | Colectomy, partial; with coloproctostomy (low pelvic anastomosis)                                                                                                                                        |
| 44146           | Colectomy, partial; with coloproctostomy (low pelvic anastomosis), with colostomy                                                                                                                        |
| 44147           | Colectomy, partial; abdominal and transanal approach                                                                                                                                                     |
| 44150           | Colectomy, total, abdominal, without proctectomy; with ileostomy or ileoproctostomy                                                                                                                      |
| 44151           | Colectomy, total, abdominal, without proctectomy; with continent ileostomy                                                                                                                               |
| 44155           | Colectomy, total, abdominal, with proctectomy; with ileostomy                                                                                                                                            |
| 44156           | Colectomy, total, abdominal, with proctectomy; with continent ileostomy                                                                                                                                  |
| 44157           | Colectomy, total, abdominal, without proctectomy; with ileoanal anastomosis, includes loop ileostomy, and rectal mucosectomy, when performed                                                             |
| 44158           | Colectomy, total, abdominal, without proctectomy; with ileoanal anastomosis, creation of ileal reservoir (S or J), includes loop ileostomy, and rectal mucosectomy, when performed                       |
| 44160           | Colectomy, partial; with removal of terminal ileum with ileocolostomy                                                                                                                                    |
| 44204           | Laparoscopic, surgical; colectomy, partial, with anastomosis                                                                                                                                             |
| 44205           | Laparoscopic, surgical; colectomy, partial, with removal of terminal ileum with ileocolostomy                                                                                                            |
| 44206           | Laparoscopic, surgical; colectomy, partial, with end colostomy and closure of distal segment (Hartman type procedure)                                                                                    |
| 44207           | Laparoscopic, surgical; colectomy, partial, with anastomosis, with coloproctostomy (low pelvic anastomosis)                                                                                              |
| 44208           | Laparoscopic, surgical; colectomy, partial, with anastomosis, with coloproctostomy (low pelvic anastomosis) with colostomy                                                                               |
| 44210           | Laparoscopic, surgical; colectomy, total, abdominal, without proctectomy, with ileostomy or ileoproctostomy                                                                                              |
| 44211           | Laparoscopic, surgical; colectomy, total, abdominal, with proctectomy, with ileoanal anastomosis, creation of ileal reservoir (S or J), with loop ileostomy, includes rectal mucosectomy, when performed |
| 44212           | Laparoscopic, surgical; colectomy, total, abdominal, with proctectomy, with ileostomy                                                                                                                    |
| 44213           | Laparoscopic, surgical; mobilization (take-down) of splenic flexure performed in conjunction with partial colectomy                                                                                      |
| 45111           | Proctectomy; partial resection of rectum, transabdominal approach                                                                                                                                        |
| 45112           | Proctectomy, combined abdominoperineal, pull-through procedure (eg, colo-anal anastomosis)                                                                                                               |
| 45113           | Proctectomy, partial, with rectal mucosectomy, ileoanal anastomosis, creation of ileal reservoir (S or J), with or without loop ileostomy                                                                |
| 45114           | Proctectomy, partial, with anastomosis; abdominal and transsacral approach                                                                                                                               |
| 45119           | Proctectomy, combined abdominoperineal pull-through procedure (eg, colo-anal anastomosis), with creation of colonic reservoir (eg, J-pouch), with diverting enterostomy when performed                   |

**eTable 6. Billing Codes for Molecular Tests**

| <b>CPT Code</b> | <b>Description</b>                                                                                                                                                     | <b>Immunohistochemistry (IHC)</b> | <b>Multigene Panels</b> |
|-----------------|------------------------------------------------------------------------------------------------------------------------------------------------------------------------|-----------------------------------|-------------------------|
| 81201           | APC (adenomatous polyposis coli) (eg, familial adenomatous polyposis [FAP], attenuated FAP) gene analysis; full gene sequence                                          |                                   |                         |
| 81202           | APC (adenomatous polyposis coli) (eg, familial adenomatous polyposis [FAP], attenuated FAP) gene analysis; known familial variants                                     |                                   |                         |
| 81203           | APC (adenomatous polyposis coli) (eg, familial adenomatous polyposis [FAP], attenuated FAP) gene analysis; duplication/deletion variants                               |                                   |                         |
| 81210           | BRAF (B-Raf proto-oncogene, serine/threonine kinase) (eg, colon cancer, melanoma), gene analysis, V600 variant(s)                                                      |                                   |                         |
| 81235           | EGFR (epidermal growth factor receptor) (eg, non-small cell lung cancer) gene analysis, common variants (eg, exon 19 LREA deletion, L858R, T790M, G719A, G719S, L861Q) |                                   |                         |
| 81275           | KRAS (Kirsten rat sarcoma viral oncogene homolog) (eg, carcinoma) gene analysis; variants in exon 2 (eg, codons 12 and 13)                                             |                                   |                         |
| 81276           | KRAS (Kirsten rat sarcoma viral oncogene homolog) (eg, carcinoma) gene analysis; additional variant(s) (eg, codon 61, codon 146)                                       |                                   |                         |
| 81288           | MLH1 (mutL homolog 1, colon cancer, nonpolyposis type 2) (eg, hereditary non-polyposis colorectal cancer, Lynch syndrome) gene analysis; promoter methylation analysis |                                   |                         |
| 81292           | MLH1 (mutL homolog 1, colon cancer, nonpolyposis type 2) (eg, hereditary non-polyposis colorectal cancer, Lynch syndrome) gene analysis; full sequence analysis        |                                   |                         |
| 81293           | MLH1 (mutL homolog 1, colon cancer, nonpolyposis type 2) (eg, hereditary non-polyposis colorectal cancer, Lynch syndrome) gene analysis; known familial variants       |                                   |                         |
| 81294           | MLH1 (mutL homolog 1, colon cancer, nonpolyposis type 2) (eg, hereditary non-polyposis colorectal cancer, Lynch syndrome) gene analysis; duplication/deletion variants |                                   |                         |
| 81295           | MSH2 (mutS homolog 2, colon cancer, nonpolyposis type 1) (eg, hereditary non-polyposis colorectal cancer, Lynch syndrome) gene analysis; full sequence analysis        |                                   |                         |
| 81296           | MSH2 (mutS homolog 2, colon cancer, nonpolyposis type 1) (eg, hereditary non-polyposis colorectal cancer, Lynch syndrome) gene analysis; known familial variants       |                                   |                         |
| 81297           | MSH2 (mutS homolog 2, colon cancer, nonpolyposis type 1) (eg, hereditary non-polyposis colorectal cancer, Lynch syndrome) gene analysis; duplication/deletion variants |                                   |                         |
| 81298           | MSH6 (mutS homolog 6 [E. coli]) (eg, hereditary non-polyposis colorectal cancer, Lynch syndrome) gene analysis; full sequence analysis                                 |                                   |                         |
| 81299           | MSH6 (mutS homolog 6 [E. coli]) (eg, hereditary non-polyposis colorectal cancer, Lynch syndrome) gene analysis; known familial variants                                |                                   |                         |
| 81300           | MSH6 (mutS homolog 6 [E. coli]) (eg, hereditary non-polyposis colorectal cancer, Lynch syndrome) gene analysis; duplication/deletion variants                          |                                   |                         |

|       |                                                                                                                                                                                                                                                                                                         |  |   |
|-------|---------------------------------------------------------------------------------------------------------------------------------------------------------------------------------------------------------------------------------------------------------------------------------------------------------|--|---|
| 81301 | Microsatellite instability analysis (eg, hereditary non-polyposis colorectal cancer, Lynch syndrome) of markers for mismatch repair deficiency (eg, BAT25, BAT26), includes comparison of neoplastic and normal tissue, if performed                                                                    |  |   |
| 81311 | NRAS (neuroblastoma RAS viral [v-ras] oncogene homolog) (eg, colorectal carcinoma), gene analysis, variants in exon 2 (eg, codons 12 and 13) and exon 3 (eg, codon 61)                                                                                                                                  |  |   |
| 81317 | PMS2 (postmeiotic segregation increased 2 [ <i>S. cerevisiae</i> ]) (eg, hereditary non-polyposis colorectal cancer, Lynch syndrome) gene analysis; full sequence analysis                                                                                                                              |  |   |
| 81318 | PMS2 (postmeiotic segregation increased 2 [ <i>S. cerevisiae</i> ]) (eg, hereditary non-polyposis colorectal cancer, Lynch syndrome) gene analysis; known familial variants                                                                                                                             |  |   |
| 81319 | PMS2 (postmeiotic segregation increased 2 [ <i>S. cerevisiae</i> ]) (eg, hereditary non-polyposis colorectal cancer, Lynch syndrome) gene analysis; duplication/deletion variants                                                                                                                       |  |   |
| 81400 | MOLECULAR PATHOLOGY PROCEDURE LEVEL 1                                                                                                                                                                                                                                                                   |  |   |
| 81401 | MOLECULAR PATHOLOGY PROCEDURE LEVEL 2                                                                                                                                                                                                                                                                   |  |   |
| 81402 | MOLECULAR PATHOLOGY PROCEDURE LEVEL 3                                                                                                                                                                                                                                                                   |  |   |
| 81403 | MOLECULAR PATHOLOGY PROCEDURE LEVEL 4                                                                                                                                                                                                                                                                   |  |   |
| 81404 | MOLECULAR PATHOLOGY PROCEDURE LEVEL 5                                                                                                                                                                                                                                                                   |  |   |
| 81405 | MOLECULAR PATHOLOGY PROCEDURE LEVEL 6                                                                                                                                                                                                                                                                   |  |   |
| 81406 | MOLECULAR PATHOLOGY PROCEDURE LEVEL 7                                                                                                                                                                                                                                                                   |  |   |
| 81407 | Molecular pathology procedure, Level 8                                                                                                                                                                                                                                                                  |  |   |
| 81408 | MOLECULAR PATHOLOGY PROCEDURE LEVEL 9                                                                                                                                                                                                                                                                   |  |   |
| 81415 | Exome (eg, unexplained constitutional or heritable disorder or syndrome); sequence analysis                                                                                                                                                                                                             |  | 1 |
| 81416 | Exome (eg, unexplained constitutional or heritable disorder or syndrome); sequence analysis, each comparator exome (eg, parents, siblings) (List separately in addition to code for primary procedure)                                                                                                  |  | 1 |
| 81417 | Exome (eg, unexplained constitutional or heritable disorder or syndrome); re-evaluation of previously obtained exome sequence (eg, updated knowledge or unrelated condition/syndrome)                                                                                                                   |  | 1 |
| 81425 | Genome (eg, unexplained constitutional or heritable disorder or syndrome); sequence analysis                                                                                                                                                                                                            |  | 1 |
| 81426 | Genome (eg, unexplained constitutional or heritable disorder or syndrome); sequence analysis, each comparator genome (eg, parents, siblings) (List separately in addition to code for primary procedure)                                                                                                |  | 1 |
| 81427 | Genome (eg, unexplained constitutional or heritable disorder or syndrome); re-evaluation of previously obtained genome sequence (eg, updated knowledge or unrelated condition/syndrome)                                                                                                                 |  | 1 |
| 81432 | Hereditary breast cancer-related disorders (eg, hereditary breast cancer, hereditary ovarian cancer, hereditary endometrial cancer); genomic sequence analysis panel, must include sequencing of at least 10 genes, always including BRCA1, BRCA2, CDH1, MLH1, MSH2, MSH6, PALB2, PTEN, STK11, and TP53 |  | 1 |

|       |                                                                                                                                                                                                                                                                                                                                                                                                                       |  |   |
|-------|-----------------------------------------------------------------------------------------------------------------------------------------------------------------------------------------------------------------------------------------------------------------------------------------------------------------------------------------------------------------------------------------------------------------------|--|---|
| 81433 | Hereditary breast cancer-related disorders (eg, hereditary breast cancer, hereditary ovarian cancer, hereditary endometrial cancer); duplication/deletion analysis panel, must include analyses for BRCA1, BRCA2, MLH1, MSH2, and STK11                                                                                                                                                                               |  | 1 |
| 81435 | Hereditary colon cancer disorders (eg, Lynch syndrome, PTEN hamartoma syndrome, Cowden syndrome, familial adenomatosis polyposis); genomic sequence analysis panel, must include sequencing of at least 10 genes, including APC, BMPR1A, CDH1, MLH1, MSH2, MSH6, MUTYH, PTEN, SMAD4, and STK11                                                                                                                        |  | 1 |
| 81436 | Hereditary colon cancer disorders (eg, Lynch syndrome, PTEN hamartoma syndrome, Cowden syndrome, familial adenomatosis polyposis); duplication/deletion analysis panel, must include analysis of at least 5 genes, including MLH1, MSH2, EPCAM, SMAD4, and STK11                                                                                                                                                      |  | 1 |
| 81445 | Targeted genomic sequence analysis panel, solid organ neoplasm, DNA analysis, and RNA analysis when performed, 5-50 genes (eg, ALK, BRAF, CDKN2A, EGFR, ERBB2, KIT, KRAS, NRAS, MET, PDGFRA, PDGFRB, PGR, PIK3CA, PTEN, RET), interrogation for sequence variants and copy number variants or rearrangements, if performed                                                                                            |  | 1 |
| 81455 | Targeted genomic sequence analysis panel, solid organ or hematolymphoid neoplasm, DNA analysis, and RNA analysis when performed, 51 or greater genes (eg, ALK, BRAF, CDKN2A, CEBPA, DNMT3A, EGFR, ERBB2, EZH2, FLT3, IDH1, IDH2, JAK2, KIT, KRAS, MLL, NPM1, NRAS, MET, NOTCH1, PDGFRA, PDGFRB, PGR, PIK3CA, PTEN, RET), interrogation for sequence variants and copy number variants or rearrangements, if performed |  | 1 |
| 81479 | Unlisted molecular pathology procedure                                                                                                                                                                                                                                                                                                                                                                                |  |   |
| 81504 | Oncology (tissue of origin), microarray gene expression profiling of > 2000 genes, utilizing formalin-fixed paraffin-embedded tissue, algorithm reported as tissue similarity scores                                                                                                                                                                                                                                  |  | 1 |
| 81525 | Oncology (colon), mRNA, gene expression profiling by real-time RT-PCR of 12 genes (7 content and 5 housekeeping), utilizing formalin-fixed paraffin-embedded tissue, algorithm reported as a recurrence score                                                                                                                                                                                                         |  | 1 |
| 81540 | Oncology (tumor of unknown origin), mRNA, gene expression profiling by real-time RT-PCR of 92 genes (87 content and 5 housekeeping) to classify tumor into main cancer type and subtype, utilizing formalin-fixed paraffin-embedded tissue, algorithm reported as a probability of a predicted main cancer type and subtype                                                                                           |  | 1 |
| 81599 | Unlisted multianalyte assay with algorithmic analysis                                                                                                                                                                                                                                                                                                                                                                 |  |   |
| 83890 | Molecular diagnostics; molecular isolation or extraction, each nucleic acid type (ie, DNA or RNA)                                                                                                                                                                                                                                                                                                                     |  |   |
| 83891 | Molecular diagnostics; isolation or extraction of highly purified nucleic acid, each nucleic acid type (ie, DNA or RNA)                                                                                                                                                                                                                                                                                               |  |   |
| 83892 | Molecular diagnostics; enzymatic digestion, each enzyme treatment                                                                                                                                                                                                                                                                                                                                                     |  |   |

|       |                                                                                                                                                                                                                            |  |  |
|-------|----------------------------------------------------------------------------------------------------------------------------------------------------------------------------------------------------------------------------|--|--|
| 83893 | Molecular diagnostics; dot/slot blot production, each nucleic acid preparation                                                                                                                                             |  |  |
| 83894 | Molecular diagnostics; separation by gel electrophoresis (eg, agarose, polyacrylamide), each nucleic acid preparation                                                                                                      |  |  |
| 83896 | Molecular diagnostics; nucleic acid probe, each                                                                                                                                                                            |  |  |
| 83897 | Molecular diagnostics; nucleic acid transfer (eg, Southern, Northern), each nucleic acid preparation                                                                                                                       |  |  |
| 83898 | Molecular diagnostics; amplification, target, each nucleic acid sequence                                                                                                                                                   |  |  |
| 83900 | Molecular diagnostics; amplification, target, multiplex, first 2 nucleic acid sequences                                                                                                                                    |  |  |
| 83901 | Molecular diagnostics; amplification, target, multiplex, each additional nucleic acid sequence beyond 2 (List separately in addition to code for primary procedure)                                                        |  |  |
| 83902 | Molecular diagnostics; reverse transcription                                                                                                                                                                               |  |  |
| 83903 | Molecular diagnostics; mutation scanning, by physical properties (eg, single strand conformational polymorphisms [SSCP], heteroduplex, denaturing gradient gel electrophoresis [DGGE], RNA'ase A), single segment, each    |  |  |
| 83904 | Molecular diagnostics; mutation identification by sequencing, single segment, each segment                                                                                                                                 |  |  |
| 83905 | Molecular diagnostics; mutation identification by allele specific transcription, single segment, each segment                                                                                                              |  |  |
| 83906 | Molecular diagnostics; mutation identification by allele specific translation, single segment, each segment                                                                                                                |  |  |
| 83907 | Molecular diagnostics; lysis of cells prior to nucleic acid extraction (eg, stool specimens, paraffin embedded tissue), each specimen                                                                                      |  |  |
| 83908 | Molecular diagnostics; amplification, signal, each nucleic acid sequence                                                                                                                                                   |  |  |
| 83909 | Molecular diagnostics; separation and identification by high resolution technique (eg, capillary electrophoresis), each nucleic acid preparation                                                                           |  |  |
| 83912 | Molecular diagnostics; interpretation and report                                                                                                                                                                           |  |  |
| 83913 | Molecular diagnostics; RNA stabilization                                                                                                                                                                                   |  |  |
| 83914 | Mutation identification by enzymatic ligation or primer extension, single segment, each segment (eg, oligonucleotide ligation assay [OLA], single base chain extension [SBCE], or allele-specific primer extension [ASPE]) |  |  |
| 83950 | Oncoprotein; HER-2/neu                                                                                                                                                                                                     |  |  |
| 88271 | Molecular cytogenetics; DNA probe, each (eg, FISH)                                                                                                                                                                         |  |  |
| 88272 | Molecular cytogenetics; chromosomal in situ hybridization, analyze 3-5 cells (eg, for derivatives and markers)                                                                                                             |  |  |
| 88273 | Molecular cytogenetics; chromosomal in situ hybridization, analyze 10-30 cells (eg, for microdeletions)                                                                                                                    |  |  |
| 88274 | Molecular cytogenetics; interphase in situ hybridization, analyze 25-99 cells                                                                                                                                              |  |  |
| 88275 | Molecular cytogenetics; interphase in situ hybridization, analyze 100-300 cells                                                                                                                                            |  |  |
| 88291 | Cytogenetics and molecular cytogenetics, interpretation and report                                                                                                                                                         |  |  |
| 88299 | Unlisted cytogenetic study                                                                                                                                                                                                 |  |  |

|       |                                                                                                                                                                                                                                                                   |   |   |
|-------|-------------------------------------------------------------------------------------------------------------------------------------------------------------------------------------------------------------------------------------------------------------------|---|---|
| 88341 | Immunohistochemistry or immunocytochemistry, per specimen; each additional single antibody stain procedure (List separately in addition to code for primary procedure)                                                                                            | 1 |   |
| 88342 | Immunohistochemistry or immunocytochemistry, per specimen; initial single antibody stain procedure                                                                                                                                                                | 1 |   |
| 88343 | Immunohistochemistry or immunocytochemistry, each separately identifiable antibody per block, cytologic preparation, or hematologic smear; each additional separately identifiable antibody per slide (List separately in addition to code for primary procedure) | 1 |   |
| 88344 | Immunohistochemistry or immunocytochemistry, per specimen; each multiplex antibody stain procedure                                                                                                                                                                | 1 |   |
| 88360 | Morphometric analysis, tumor immunohistochemistry (eg, Her-2/neu, estrogen receptor/progesterone receptor), quantitative or semiquantitative, per specimen, each single antibody stain procedure; manual                                                          | 1 |   |
| 88361 | Morphometric analysis, tumor immunohistochemistry (eg, Her-2/neu, estrogen receptor/progesterone receptor), quantitative or semiquantitative, per specimen, each single antibody stain procedure; using computer-assisted technology                              | 1 |   |
| 88363 | Examination and selection of retrieved archival (ie, previously diagnosed) tissue(s) for molecular analysis (eg, KRAS mutational analysis)                                                                                                                        |   |   |
| 88364 | In situ hybridization (eg, FISH), per specimen; each additional single probe stain procedure (List separately in addition to code for primary procedure)                                                                                                          |   |   |
| 88365 | In situ hybridization (eg, FISH), per specimen; initial single probe stain procedure                                                                                                                                                                              |   |   |
| 88366 | In situ hybridization (eg, FISH), per specimen; each multiplex probe stain procedure                                                                                                                                                                              |   |   |
| 88367 | Morphometric analysis, in situ hybridization (quantitative or semi-quantitative), using computer-assisted technology, per specimen; initial single probe stain procedure                                                                                          |   |   |
| 88368 | Morphometric analysis, in situ hybridization (quantitative or semi-quantitative), manual, per specimen; initial single probe stain procedure                                                                                                                      |   |   |
| 88369 | Morphometric analysis, in situ hybridization (quantitative or semi-quantitative), manual, per specimen; each additional single probe stain procedure (List separately in addition to code for primary procedure)                                                  |   |   |
| 88373 | Morphometric analysis, in situ hybridization (quantitative or semi-quantitative), using computer-assisted technology, per specimen; each additional single probe stain procedure (List separately in addition to code for primary procedure)                      |   |   |
| 88374 | Morphometric analysis, in situ hybridization (quantitative or semi-quantitative), using computer-assisted technology, per specimen; each multiplex probe stain procedure                                                                                          |   |   |
| 88377 | Morphometric analysis, in situ hybridization (quantitative or semi-quantitative), manual, per specimen; each multiplex probe stain procedure                                                                                                                      |   |   |
| 88384 | Array-based evaluation of multiple molecular probes; 11 through 50 probes                                                                                                                                                                                         |   | 1 |
| 88385 | Array-based evaluation of multiple molecular probes; 51 through 250 probes                                                                                                                                                                                        |   | 1 |



|       |                                                                                                                                                                                                                                                                                                                                                                                                          |  |   |
|-------|----------------------------------------------------------------------------------------------------------------------------------------------------------------------------------------------------------------------------------------------------------------------------------------------------------------------------------------------------------------------------------------------------------|--|---|
| 88386 | Array-based evaluation of multiple molecular probes; 251 through 500 probes                                                                                                                                                                                                                                                                                                                              |  | 1 |
| 0007M | Oncology (gastrointestinal neuroendocrine tumors), real-time PCR expression analysis of 51 genes, utilizing whole peripheral blood, algorithm reported as a nomogram of tumor disease index                                                                                                                                                                                                              |  | 1 |
| 0013U | Oncology (solid organ neoplasia), gene rearrangement detection by whole genome next-generation sequencing, DNA, fresh or frozen tissue or cells, report of specific gene rearrangement(s)                                                                                                                                                                                                                |  | 1 |
| 0019U | Oncology, RNA, gene expression by whole transcriptome sequencing, formalin-fixed paraffin embedded tissue or fresh frozen tissue, predictive algorithm reported as potential targets for therapeutic agents                                                                                                                                                                                              |  | 1 |
| 0022U | Targeted genomic sequence analysis panel, non-small cell lung neoplasia, DNA and RNA analysis, 23 genes, interrogation for sequence variants and rearrangements, reported as presence/absence of variants and associated therapy(ies) to consider                                                                                                                                                        |  | 1 |
| 0036U | Exome (ie, somatic mutations), paired formalin-fixed paraffin-embedded tumor tissue and normal specimen, sequence analyses                                                                                                                                                                                                                                                                               |  | 1 |
| 0037U | Targeted genomic sequence analysis, solid organ neoplasm, DNA analysis of 324 genes, interrogation for sequence variants, gene copy number amplifications, gene rearrangements, microsatellite instability and tumor mutational burden                                                                                                                                                                   |  | 1 |
| 0048U | Oncology (solid organ neoplasia), DNA, targeted sequencing of protein-coding exons of 468 cancer-associated genes, including interrogation for somatic mutations and microsatellite instability, matched with normal specimens, utilizing formalin-fixed paraffin-embedded tumor tissue, report of clinically significant mutation(s)                                                                    |  | 1 |
| 0057U | Oncology (solid organ neoplasia), mRNA, gene expression profiling by massively parallel sequencing for analysis of 51 genes, utilizing formalin-fixed paraffin-embedded tissue, algorithm reported as a normalized percentile rank                                                                                                                                                                       |  | 1 |
| 0069U | Oncology (colorectal), microRNA, RT-PCR expression profiling of miR-31-3p, formalin-fixed paraffin-embedded tissue, algorithm reported as an expression score                                                                                                                                                                                                                                            |  |   |
| 0094U | Genome (eg, unexplained constitutional or heritable disorder or syndrome), rapid sequence analysis                                                                                                                                                                                                                                                                                                       |  | 1 |
| 0101U | Hereditary colon cancer disorders                                                                                                                                                                                                                                                                                                                                                                        |  | 1 |
| 0104U | Hereditary pan cancer (eg, hereditary breast and ovarian cancer, hereditary endometrial cancer, hereditary colorectal cancer), genomic sequence analysis panel utilizing a combination of NGS, Sanger, MLPA, and array CGH, with MRNA analytics to resolve variants of unknown significance when indicated (32 genes [sequencing and deletion/duplication], EPCAM and GREM1 [deletion/duplication only]) |  | 1 |
| 0111U | Oncology (colon cancer), targeted KRAS (codons 12, 13, and 61) and NRAS (codons 12, 13, and 61) gene analysis utilizing formalin-fixed paraffin-embedded tissue                                                                                                                                                                                                                                          |  |   |

|       |                                                                                                                                                                                                                                                                                                       |  |   |
|-------|-------------------------------------------------------------------------------------------------------------------------------------------------------------------------------------------------------------------------------------------------------------------------------------------------------|--|---|
| 0130U | Hereditary colon cancer disorders (eg, Lynch syndrome, PTEN hamartoma syndrome, Cowden syndrome, familial adenomatous polyposis), targeted mRNA sequence analysis panel (APC, CDH1, CHEK2, MLH1, MSH2, MSH6, MUTYH, PMS2, PTEN, and TP53) (List separately in addition to code for primary procedure) |  | 1 |
| 0134U | Hereditary pan cancer (eg, hereditary breast and ovarian cancer, hereditary endometrial cancer, hereditary colorectal cancer), targeted mRNA sequence analysis panel (18 genes) (List separately in addition to code for primary procedure)                                                           |  | 1 |

*Multigene panels were defined as panels that included testing for at least 5 genes.*

**eTable 7. ICD-10 Codes for Colorectal Cancer Categorized by Site**

| <b>ICD-10 Code</b> | <b>Description</b>                               | <b>Side</b> |
|--------------------|--------------------------------------------------|-------------|
| C180               | Malignant neoplasm of cecum                      | right sided |
| C181               | Malignant neoplasm of appendix                   | right sided |
| C182               | Malignant neoplasm of ascending colon            | right sided |
| C183               | Malignant neoplasm of hepatic flexure            | right sided |
| C184               | Malignant neoplasm of transverse colon           | right sided |
| C185               | Malignant neoplasm of splenic flexure            | left sided  |
| C186               | Malignant neoplasm of descending colon           | left sided  |
| C187               | Malignant neoplasm of sigmoid colon              | left sided  |
| C188               | Malignant neoplasm of overlapping sites of colon | NOS         |
| C189               | Malignant neoplasm of colon, unspecified         | NOS         |
| C19                | Malignant neoplasm of rectosigmoid junction      | rectal      |
| C20                | Malignant neoplasm of rectum                     | rectal      |

**eTable 8. Full Regression Results**

|                                     |                            | Any Molecular Testing |                            |                   |                            | Targeted Therapy Use |                            |                   |                            |
|-------------------------------------|----------------------------|-----------------------|----------------------------|-------------------|----------------------------|----------------------|----------------------------|-------------------|----------------------------|
|                                     |                            | NSCLC                 |                            | Colorectal Cancer |                            | NSCLC                |                            | Colorectal Cancer |                            |
| <b>Year and quarter</b>             |                            | Unadjusted rate       | Adjusted PP diff. (95% CI) | Unadjusted rate   | Adjusted PP diff. (95% CI) | Unadjusted rate      | Adjusted PP diff. (95% CI) | Unadjusted rate   | Adjusted PP diff. (95% CI) |
|                                     |                            |                       | 0.5 (0.4 to 0.5)           |                   | 1.0 (0.9 to 1.1)           |                      | -0.3 (-0.4 to -0.3)        |                   | -0.01 (-0.07 to 0.05)      |
| <b>Age</b>                          | 65-69 (ref.)               | 71.3                  |                            | 47.7              |                            | 9.0                  |                            | 7.1               |                            |
|                                     | 70-74                      | 81.7                  | 9.0 (8.4 to 9.6)           | 58.1              | 8.8 (7.5 to 10.1)          | 7.1                  | -1.0 (-1.6 to -0.4)        | 4.3               | -2.5 (-3.2 to -1.8)        |
|                                     | 75-59                      | 83.4                  | 10.3 (9.6 to 11.0)         | 58.6              | 8.8 (7.4 to 10.2)          | 7.6                  | -0.2 (-0.8 to 0.4)         | 3.3               | -3.4 (-4.2 to -2.7)        |
|                                     | 80-84                      | 83.7                  | 10.6 (9.8 to 11.4)         | 57.6              | 7.5 (5.9 to 9.1)           | 11.9                 | 3.4 (2.6 to 4.1)           | 2.8               | -3.8 (-4.7 to -2.9)        |
|                                     | ≥ 85                       | 83.3                  | 10.0 (9.0 to 11.1)         | 52.6              | 2.5 (0.7 to 4.2)           | 20.3                 | 10.7 (9.6 to 11.7)         | 2.0               | -4.4 (-5.5 to -3.4)        |
| <b>Sex</b>                          | Female (ref.)              | 79.7                  |                            | 54.8              |                            | 12.2                 |                            | 4.0               |                            |
|                                     | Male                       | 79.0                  | -1.4 (-1.9 to -1.0)        | 53.1              | -2.0 (-3.0 to -1.1)        | 5.9                  | -5.8 (-6.3 to -5.4)        | 5.4               | 1.2 (0.7 to 1.8)           |
| <b>Race</b>                         | White, non-Hispanic (ref.) | 80.2                  |                            | 54.7              |                            | 7.4                  |                            | 4.6               |                            |
|                                     | Black                      | 74.6                  | -2.7 (-3.7 to -1.8)        | 51.0              | -1.9 (-3.8 to -0.1)        | 7.5                  | 1.0 (0.1 to 1.9)           | 5.2               | 0.2 (-0.9 to 1.2)          |
|                                     | Hispanic                   | 73.6                  | -2.0 (-4.6 to 0.5)         | 44.6              | -4.7 (-8.7 to -0.7)        | 20.8                 | 11.9 (9.8 to 14.1)         | 4.8               | 0.5 (-2.6 to 1.6)          |
|                                     | Asian                      | 75.5                  | -1.2 (-3.0 to 0.5)         | 45.3              | -5.6 (-8.9 to -2.2)        | 46.6                 | 34.7 (33.2 to 36.1)        | 4.5               | -0.4 (-2.2 to 1.3)         |
|                                     | Other                      | 73.5                  | -3.5 (-4.8 to -2.1)        | 51.4              | -0.9 (-3.3 to 1.5)         | 22.6                 | 14.0 (12.7 to 15.3)        | 6.5               | 0.7 (-0.7 to 2.1)          |
| <b>Urban/rural</b>                  | Urban (ref.)               | 79.3                  |                            | 53.8              |                            | 10.0                 |                            | 4.9               |                            |
|                                     | Large rural                | 79.2                  | 0.4 (-0.4 to 1.3)          | 52.2              | -1.2 (-2.9 to 0.4)         | 6.1                  | -0.4 (-1.2 to 0.4)         | 3.8               | -1.1 (-2.0 to -0.1)        |
|                                     | Small rural                | 80.2                  | 1.5 (0.4 to 2.6)           | 55.3              | 1.4 (-0.7 to 3.4)          | 5.3                  | -1.1 (-2.1 to -0.1)        | 4.7               | -0.1 (-1.2 to 1.1)         |
|                                     | Isolated                   | 80.3                  | 1.9 (0.7 to 3.1)           | 56.3              | 2.2 (-0.2 to 4.6)          | 6.7                  | -0.5 (-1.7 to 0.6)         | 4.3               | -0.6 (-1.9 to 0.8)         |
| <b>Median income*</b>               | ≥ \$80,000 (ref.)          | 80.8                  |                            | 55.4              |                            | 13.5                 |                            | 4.8               |                            |
|                                     | \$60,000 - \$80,000        | 79.6                  | -0.6 (-1.5 to 0.2)         | 55.4              | 1.0 (-0.8 to 2.7)          | 10.4                 | -0.4 (-1.2 to 0.4)         | 4.6               | -0.3 (-1.2 to 0.7)         |
|                                     | \$40,000 - \$60,000        | 79.5                  | -0.3 (-1.3 to 0.6)         | 53.7              | 0.9 (-0.9 to 2.8)          | 7.8                  | -1.5 (-2.3 to -0.6)        | 4.8               | -0.1 (-1.1 to 0.9)         |
|                                     | < \$40,000                 | 77.6                  | -1.1 (-2.2 to 0.1)         | 51.7              | 0.7 (-1.7 to 3.0)          | 6.9                  | -2.1 (-3.2 to -1.1)        | 4.6               | -0.3 (-1.6 to 1.0)         |
|                                     | Unknown                    | 80.7                  | -0.6 (-5.4 to 4.2)         | 52.5              | -6.6 (-16.3 to 3.1)        | 9.8                  | -2.4 (-7.0 to 2.1)         | 5.7               | -3.0 (-8.5 to 2.5)         |
| <b>High school graduation rate*</b> | ≥ 93% (ref.)               | 80.8                  |                            | 55.9              |                            | 11.5                 |                            | 4.6               |                            |
|                                     | 89% - 93%                  | 79.5                  | -1.1 (-1.8 to -0.3)        | 55.2              | -0.2 (-1.7 to 1.3)         | 8.4                  | -1.3 (-2.0 to -0.7)        | 4.6               | 0.02 (-0.8 to 0.9)         |
|                                     | 83% - 89%                  | 79.3                  | -1.1 (-1.9 to -0.2)        | 53.2              | -1.6 (-3.3 to 0.1)         | 7.3                  | -1.5 (-2.3 to -0.8)        | 4.7               | 0.2 (-0.7 to 1.1)          |
|                                     | 0% - 83%                   | 77.4                  | -1.8 (-2.8 to -0.8)        | 51.0              | -2.3 (-4.2 to -0.4)        | 8.9                  | -1.1 (-2.0 to -0.2)        | 4.9               | 0.3 (-0.8 to 1.3)          |
|                                     | Unknown                    | 80.8                  | 1.1 (-4.1 to 6.3)          | 53.6              | 7.5 (-2.8 to 17.8)         | 10.4                 | 2.1 (-2.8 to 7.0)          | 6.4               | 4.3 (-1.6 to 10.2)         |
| <b>Dual eligible</b>                | No (ref.)                  | 80.3                  |                            | 54.9              |                            | 8.3                  |                            | 4.7               |                            |
|                                     | Yes                        | 74.6                  | -3.9 (-4.6 to -3.2)        | 49.1              | -4.2 (-5.6 to -2.8)        | 12.6                 | 1.1 (0.5 to 1.8)           | 4.7               | -0.3 (-1.1 to 0.4)         |
| <b>Charlson score</b>               | 0 (ref.)                   | 72.5                  |                            | 48.8              |                            | 13.4                 |                            | 5.3               |                            |
|                                     | 1                          | 83.6                  | 10.7 (10.1 to 11.3)        | 61.0              | 11.4 (10.1 to 12.7)        | 6.6                  | -5.6 (-6.2 to -5.0)        | 4.0               | -0.8 (-1.6 to -0.1)        |
|                                     | 2                          | 82.8                  | 9.7 (9.0 to 10.4)          | 59.9              | 10.2 (8.6 to 11.8)         | 6.0                  | -5.7 (-6.4 to -5.0)        | 4.1               | -0.6 (-1.5 to 0.3)         |
|                                     | 3+                         | 83.9                  | 10.4 (9.8 to 11.1)         | 59.8              | 10.0 (8.5 to 11.5)         | 5.9                  | -5.5 (-6.2 to -4.8)        | 3.5               | -1.1 (-2.0 to -0.3)        |
| <b>Practice type</b>                | NCI Center (ref.)          | 78.9                  |                            | 56.9              |                            | 16.6                 |                            | 5.0               |                            |
|                                     | Academic center            | 78.3                  | -1.3 (-3.7 to 1.1)         | 57.2              | 0.8 (-3.2 to 4.9)          | 9.1                  | -4.8 (-6.4 to -3.2)        | 6.1               | 1.2 (-0.4 to 2.7)          |
|                                     | Other hospital             | 79.3                  | -0.4 (-2.0 to 1.2)         | 54.2              | -3.8 (-6.4 to -1.2)        | 8.2                  | -5.4 (-6.4 to -4.3)        | 4.8               | -0.05 (-1.0 to 0.9)        |
|                                     | Large independent          | 80.4                  | -0.01 (-1.7 to 1.7)        | 53.7              | -3.3 (-6.1 to -0.4)        | 6.9                  | -6.4 (-7.5 to -5.2)        | 4.4               | -0.3 (-1.4 to 0.9)         |
|                                     | Small independent          | 78.1                  | -1.4 (-3.3 to 0.5)         | 45.1              | -12.2 (-15.3 to -9.1)      | 8.5                  | -6.2 (-7.6 to -4.8)        | 3.6               | -1.2 (-2.6 to 0.1)         |
| <b>Primary tumor site</b>           | Right-sided (ref.)         |                       |                            | 57.2              |                            |                      |                            | 3.6               |                            |
|                                     | Left-sided                 |                       |                            | 54.5              | -0.8 (-2.4 to 0.9)         |                      |                            | 9.8               | 5.7 (4.8 to 6.6)           |
|                                     | Rectal                     |                       |                            | 52.9              | -3.7 (-4.9 to -2.4)        |                      |                            | 3.2               | -0.6 (-1.4 to 0.1)         |
|                                     | NOS                        |                       |                            | 52.0              | -4.4 (-5.9 to -2.8)        |                      |                            | 6.2               | 2.6 (1.7 to 3.5)           |

PP=percentage point

**eTable 9. NSCLC Molecular Testing Sensitivity Analysis (Excluding IHC)**

|                                     | Adjusted PP diff. (95% CI) |                 |
|-------------------------------------|----------------------------|-----------------|
| <b>Year and quarter</b>             | 0.8%                       | (0.7 to 0.8)    |
| <b>Age</b>                          |                            |                 |
| 65-69 (ref)                         |                            |                 |
| 70-74                               | 5.6%                       | (4.8 to 6.4)    |
| 75-59                               | 6.4%                       | (5.6 to 7.2)    |
| 80-84                               | 8.7%                       | (7.7 to 9.6)    |
| ≥ 85                                | 10.9%                      | (9.7 to 12.2)   |
| <b>Sex</b>                          |                            |                 |
| Female (ref)                        |                            |                 |
| Male                                | -3.9%                      | (-4.5 to -3.3)  |
| <b>Race</b>                         |                            |                 |
| White, non-Hispanic (ref)           |                            |                 |
| Black                               | -0.9%                      | (-2.1 to 0.3)   |
| Hispanic                            | 1.0%                       | (-2.1 to 4.2)   |
| Asian                               | 5.7%                       | (3.5 to 7.8)    |
| Other/Unknown                       | 0.2%                       | (-1.5 to 1.8)   |
| <b>Urban/rural</b>                  |                            |                 |
| Urban (ref)                         |                            |                 |
| Large Rural                         | 0.2%                       | (-0.9 to 1.3)   |
| Small Rural                         | 0.5%                       | (-0.8 to 1.9)   |
| Isolated                            | 0.4%                       | (-1.2 to 1.9)   |
| <b>Median income*</b>               |                            |                 |
| ≥ \$80,000 (ref)                    |                            |                 |
| \$60,000 - \$80,000                 | -1.5%                      | (-2.6 to -0.4)  |
| \$40,000 - \$60,000                 | -2.1%                      | (-3.3 to -0.9)  |
| < \$40,000                          | -2.5%                      | (-4.0 to -1.0)  |
| Unknown                             | -1.3%                      | (-7.3 to 4.6)   |
| <b>High school graduation rate*</b> |                            |                 |
| ≥ 93% (ref)                         |                            |                 |
| 89% - 93%                           | -0.9%                      | (-1.7 to 0.1)   |
| 83% - 89%                           | -2.1%                      | (-3.1 to -1.0)  |
| 0% - 83%                            | -2.9%                      | (-4.2 to -1.7)  |
| Unknown                             | 1.6%                       | (-4.8 to 8.0)   |
| <b>Dual eligible</b>                |                            |                 |
| No (ref)                            |                            |                 |
| Yes                                 | -4.1%                      | (-5.0 to -3.2)  |
| <b>Charlson score</b>               |                            |                 |
| 0 (ref)                             |                            |                 |
| 1                                   | 2.5%                       | (1.8 to 3.2)    |
| 2                                   | 0.6%                       | (-0.3 to 1.5)   |
| 3+                                  | -0.5%                      | (-1.3 to 0.3)   |
| <b>Practice type</b>                |                            |                 |
| NCI center (ref)                    |                            |                 |
| Academic Center                     | -6.7%                      | (-10.6 to -2.8) |
| Other Hospital                      | -1.6%                      | (-4.1 to 1.0)   |
| Large Independent Practice          | -0.5%                      | (-3.5 to 2.5)   |
| Small Independent Practice          | -2.5%                      | (-5.5 to 0.5)   |

PP = percentage point

**eTable 10. NSCLC Molecular Testing Sensitivity Analysis (Bevacizumab/Pemetrexed)**

|                                     | Adjusted PP diff. (95% CI) |                |
|-------------------------------------|----------------------------|----------------|
| <b>Year and quarter</b>             | 0.3%                       | (0.2 to 0.3)   |
| <b>Age</b>                          |                            |                |
| 65-69 (ref)                         |                            |                |
| 70-74                               | 6.6%                       | (5.6 to 7.5)   |
| 75-59                               | 7.1%                       | (6.1 to 8.2)   |
| 80-84                               | 5.3%                       | (4.0 to 6.6)   |
| ≥ 85                                | -2.5%                      | (-4.3 to -0.6) |
| <b>Sex</b>                          |                            |                |
| Female (ref)                        |                            |                |
| Male                                | 1.2%                       | (0.5 to 2.0)   |
| <b>Race</b>                         |                            |                |
| White, non-Hispanic (ref)           |                            |                |
| Black                               | -1.4%                      | (-2.9 to 0.2)  |
| Hispanic                            | 1.4%                       | (-3.0 to 5.7)  |
| Asian                               | -5.5%                      | (-8.5 to -2.5) |
| Other/Unknown                       | -4.9%                      | (-7.0 to -2.8) |
| <b>Urban/rural</b>                  |                            |                |
| Urban (ref)                         |                            |                |
| Large Rural                         | 0.4%                       | (-1.0 to 1.7)  |
| Small Rural                         | 2.3%                       | (0.5 to 4.0)   |
| Isolated                            | 1.1%                       | (-0.9 to 3.1)  |
| <b>Median income*</b>               |                            |                |
| ≥ \$80,000 (ref)                    |                            |                |
| \$60,000 - \$80,000                 | -1.3%                      | (-2.6 to 0.0)  |
| \$40,000 - \$60,000                 | -0.5%                      | (-1.9 to 0.9)  |
| < \$40,000                          | -1.5%                      | (-3.3 to 0.3)  |
| Unknown                             | -3.9%                      | (-11.8 to 4.0) |
| <b>High school graduation rate*</b> |                            |                |
| ≥ 93% (ref)                         |                            |                |
| 89% - 93%                           | 0.2%                       | (-1.0 to 1.3)  |
| 83% - 89%                           | -0.6%                      | (-1.8 to 0.7)  |
| 0% - 83%                            | -0.2%                      | (-1.6 to 1.3)  |
| Unknown                             | 3.7%                       | (-11.8 to 4.0) |
| <b>Dual eligible</b>                |                            |                |
| No (ref)                            |                            |                |
| Yes                                 | -3.7%                      | (-5.0 to -2.5) |
| <b>Charlson score</b>               |                            |                |
| 0 (ref)                             |                            |                |
| 1                                   | 8.6%                       | (7.7 to 9.5)   |
| 2                                   | 8.0%                       | (6.9 to 9.2)   |
| 3+                                  | 8.3%                       | (7.2 to 9.4)   |
| <b>Practice type</b>                |                            |                |
| NCI center (ref)                    |                            |                |
| Academic Center                     | -1.8%                      | (-4.9 to 1.2)  |
| Other Hospital                      | -0.7%                      | (-2.7 to 1.2)  |
| Large Independent Practice          | -0.4%                      | (-2.8 to 1.9)  |
| Small Independent Practice          | -4.3%                      | (-6.9 to -1.6) |

PP = percentage point

**eTable 11. CRC Molecular Testing Sensitivity Analysis (Excluding IHC)**

Adjusted PP diff. (95% CI)

|                                     |        |                  |
|-------------------------------------|--------|------------------|
| <b>Year and quarter</b>             | 0.6%   | (0.6 to 0.7)     |
| <b>Age</b>                          |        |                  |
| 65-69 (ref)                         |        |                  |
| 70-74                               | 3.7%   | (2.6 to 4.8)     |
| 75-59                               | 3.2%   | (2.1 to 4.4)     |
| 80-84                               | 1.2%   | (-0.1 to 2.6)    |
| ≥ 85                                | -1.8%  | (-3.2 to 0.3)    |
| <b>Sex</b>                          |        |                  |
| Female (ref)                        |        |                  |
| Male                                | 0.5%   | (-0.3 to 1.4)    |
| <b>Race</b>                         |        |                  |
| White, non-Hispanic (ref)           |        |                  |
| Black                               | -1.0%  | (-2.5 to 0.6)    |
| Hispanic                            | -2.4%  | (-5.8 to 1.0)    |
| Asian                               | -2.7%  | (-5.5 to 0.2)    |
| Other/Unknown                       | 0.7%   | (-1.3 to 2.70)   |
| <b>Urban/rural</b>                  |        |                  |
| Urban (ref)                         |        |                  |
| Large Rural                         | -0.8%  | (-2.2 to 0.6)    |
| Small Rural                         | 2.0%   | (0.2 to 3.7)     |
| Isolated                            | 0.5%   | (-1.6 to 2.5)    |
| <b>Median income*</b>               |        |                  |
| ≥ \$80,000 (ref)                    |        |                  |
| \$60,000 - \$80,000                 | 1.1%   | (-0.4 to 2.6)    |
| \$40,000 – \$60,000                 | 1.4%   | (-0.2 to 3.0)    |
| < \$40,000                          | 1.3%   | (0.7 to 3.3)     |
| Unknown                             | -1.3%  | (-9.5 to 6.9)    |
| <b>High school graduation rate*</b> |        |                  |
| ≥ 93% (ref)                         |        |                  |
| 89% - 93%                           | -0.4%  | (-1.7 to 0.9)    |
| 83% – 89%                           | -0.7%  | (-2.1 to 0.7)    |
| 0% – 83%                            | -1.0%  | (-2.6 to 0.6)    |
| Unknown                             | 2.2%   | (-6.6 to 10.9)   |
| <b>Dual eligible</b>                |        |                  |
| No (ref)                            |        |                  |
| Yes                                 | -2.9%  | (-4.1 to -1.8)   |
| <b>Charlson score</b>               |        |                  |
| 0 (ref)                             |        |                  |
| 1                                   | 5.2%   | (4.1 to 6.2)     |
| 2                                   | 3.4%   | (2.1 to 4.8)     |
| 3+                                  | 2.3%   | (1.0 to 3.6)     |
| <b>Practice type</b>                |        |                  |
| NCI center (ref)                    |        |                  |
| Academic Center                     | -0.3%  | (-3.7 to 3.0)    |
| Other Hospital                      | 0.0%   | (-2.1 to 2.2)    |
| Large Independent Practice          | 1.4%   | (-1.2 to 4.1)    |
| Small Independent Practice          | -6.3%  | (-9.1 to -3.5)   |
| <b>Tumor location</b>               |        |                  |
| Right-sided (ref)                   |        |                  |
| Left-sided                          | 0.3%   | (-1.1 to 1.7)    |
| Rectal                              | -11.8% | (-12.9 to -10.7) |
| Not specified                       | -2.7%  | (-4.0 to -1.3)   |

PP = percentage point

**eTable 12. NSCLC Targeted Therapy Sensitivity Analysis (2017-2019)**

|                         | Adjusted PP diff. (95% CI) |                |
|-------------------------|----------------------------|----------------|
| <b>Year and quarter</b> | -0.1%                      | (-0.21 to 0.0) |
| <b>Age</b>              |                            |                |

|                                     |       |                |
|-------------------------------------|-------|----------------|
| 65-69 (ref)                         |       |                |
| 70-74                               | -0.7% | (-1.4 to 0.0)  |
| 75-59                               | -0.1% | (-0.9 to 0.6)  |
| 80-84                               | 2.5%  | (1.6 to 3.4)   |
| ≥ 85                                | 7.5%  | (6.3 to 8.8)   |
| <b>Sex</b>                          |       |                |
| Female (ref)                        |       |                |
| Male                                | -5.3% | (-.8 to -4.7)  |
| <b>Race</b>                         |       |                |
| White, non-Hispanic (ref)           |       |                |
| Black                               | 0.8%  | (-0.3 to 1.9)  |
| Hispanic                            | 11.9% | (9.2 to 14.5)  |
| Asian                               | 35.9% | (34.1 to 37.7) |
| Other/Unknown                       | 13.3% | (11.8 to 14.7) |
| <b>Urban/rural</b>                  |       |                |
| Urban (ref)                         |       |                |
| Large Rural                         | -0.5% | (-1.4 to 0.4)  |
| Small Rural                         | -0.3% | (-1.6 to 0.9)  |
| Isolated                            | -0.9% | (-2.2 to 0.5)  |
| <b>Median income*</b>               |       |                |
| ≥ \$80,000 (ref)                    |       |                |
| \$60,000 - \$80,000                 | -0.5% | (-1.4 to 0.4)  |
| \$40,000 – \$60,000                 | -2.1% | (-3.1 to -1.1) |
| < \$40,000                          | -2.9% | (-4.2 to -1.6) |
| Unknown                             | -2.3% | (-7.7 to 3.1)  |
| <b>High school graduation rate*</b> |       |                |
| ≥ 93% (ref)                         |       |                |
| 89% - 93%                           | -1.2% | (-2.1 to -0.4) |
| 83% – 89%                           | -1.5% | (2.5 to -0.4)  |
| 0% – 83%                            | -1.0% | (-2.1 to 0.0)  |
| Unknown                             | 2.0%  | (-3.9 to 7.9)  |
| <b>Dual eligible</b>                |       |                |
| No (ref)                            |       |                |
| Yes                                 | 2.2%  | (1.5 to 3.0)   |
| <b>Charlson score</b>               |       |                |
| 0 (ref)                             |       |                |
| 1                                   | -5.4% | (-6.1 to -4.7) |
| 2                                   | -5.4% | (-6.3 to -4.6) |
| 3+                                  | -5.6% | (-6.4 to -4.8) |
| <b>Practice type</b>                |       |                |
| NCI center (ref)                    |       |                |
| Academic Center                     | -5.7% | (-7.5 to -4.0) |
| Other Hospital                      | -6.2% | (-7.4 to -5.1) |
| Large Independent Practice          | -7.0% | (-8.5 to -5.6) |
| Small Independent Practice          | -6.4% | (-8.2 to -4.6) |

PP = percentage point



**eTable 13. Variation Across Oncology Practices**

|            | <b>Molecular Testing</b> |              | <b>Targeted Therapy Use</b> |              |
|------------|--------------------------|--------------|-----------------------------|--------------|
|            | <b>Colorectal Cancer</b> | <b>NSCLC</b> | <b>Colorectal Cancer</b>    | <b>NSCLC</b> |
| <b>95%</b> | 60.5                     | 83.7         | 5.3                         | 11.6         |
| <b>75%</b> | 55.5                     | 80.4         | 4.7                         | 9.4          |
| <b>50%</b> | <b>53.0</b>              | <b>79.7</b>  | <b>4.7</b>                  | <b>9.0</b>   |
| <b>25%</b> | 52.1                     | 78.0         | 4.6                         | 8.5          |
| <b>10%</b> | 50.3                     | 76.6         | 4.4                         | 7.8          |
| <b>5%</b>  | 48.8                     | 75.2         | 4.3                         | 7.3          |

**eFigure. Trends in Use of Erlotinib and Other Targeted Therapies**

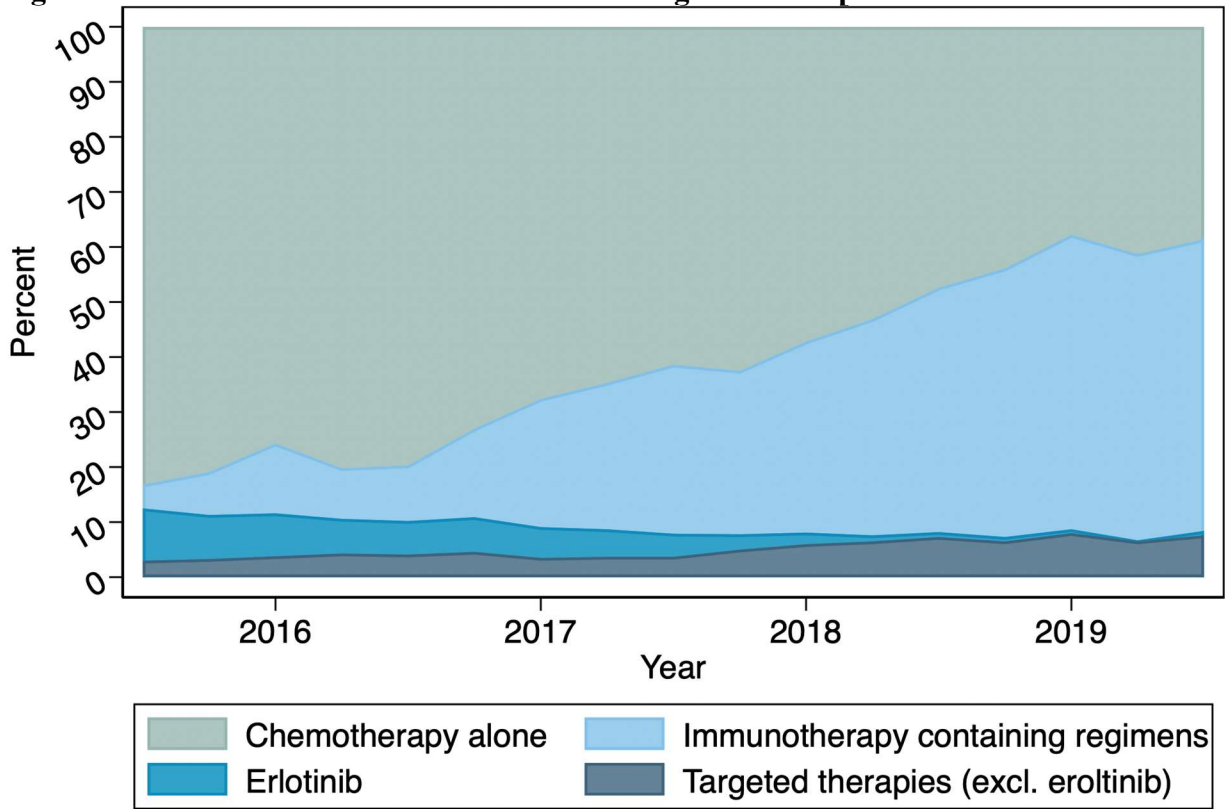

Supplement: jamanetwopen-e2310809-s001.pdf [file jamanetwopen-e2310809-s001.pdf]
