# Supplementary material for: Practice-Level Variation in Molecular Testing and Use of Targeted Therapy for Patients With Non–Small Cell Lung Cancer and Colorectal Cancer
Source: PubMed Central journal article supplement (PMC10148196; doi:10.1001/jamanetworkopen.2023.10809), 2023-04-28
Supplement: jamanetwopen-e2310809-s002.pdf [file jamanetwopen-e2310809-s002.pdf]

## Data Sharing Statement

Roberts. Practice-Level Variation in Molecular Testing and Use of Targeted Therapy for Patients With Non-Small Cell Lung Cancer and Colorectal Cancer. *JAMA Netw Open*. Published April 28, 2023. doi:10.1001/jamanetworkopen.2023.10809

### Data

**Data available:** No

### Additional Information

**Explanation for why data not available:** Medicare claims
